# Supplementary material for: Tumor Immune Microenvironment Related Gene-Based Model to Predict Prognosis and Response to Compounds in Ovarian Cancer
Source: Frontiers journal article supplement (doi:10.3389/fonc.2021.807410), 2021-12-13
Supplement: Table_1.xls [file Table_1.xls]

## Sheet: Table S1
	level	training datasets	testing datasets	p	test	SMD	Missing
n		263	112
event (mean (SD)		0.61 (0.49)	0.62 (0.49)	0.944		0.008	0
time (mean (SD)		1139.25 (944.99)	1314.31 (944.26)	0.101		0.185	0
age (%)	<60	136 ( 51.7)	61 ( 54.5)	0.707		0.055	0
	>=60	127 ( 48.3)	51 ( 45.5)
site (%)	Bilateral	176 ( 71.0)	77 ( 72.6)	0.849		0.037	5.6
	Unilateral	72 ( 29.0)	29 ( 27.4)
FIGO (%)	II	16 ( 6.2)	7 ( 6.2)	0.998		0.007	0.8
	III	204 ( 78.5)	88 ( 78.6)
	IV	40 ( 15.4)	17 ( 15.2)
lymphatic_invasion (%)		157 ( 59.7)	70 ( 62.5)	0.87		0.06	0
	NO	34 ( 12.9)	14 ( 12.5)
	YES	72 ( 27.4)	28 ( 25.0)
Grade (%)		2 ( 0.8)	0 ( 0.0)	0.502		0.301	0
	G1	1 ( 0.4)	0 ( 0.0)
	G2	27 ( 10.3)	15 ( 13.4)
	G3	225 ( 85.6)	96 ( 85.7)
	G4	1 ( 0.4)	0 ( 0.0)
	GB	1 ( 0.4)	1 ( 0.9)
	GX	6 ( 2.3)	0 ( 0.0)
Debulking (%)	Optimal	169 ( 72.8)	68 ( 67.3)	0.373		0.121	11.2
	Suboptimal	63 ( 27.2)	33 ( 32.7)
venous_invasion (%)		192 ( 73.0)	80 ( 71.4)	0.922		0.045	0
	NO	27 ( 10.3)	13 ( 11.6)
	YES	44 ( 16.7)	19 ( 17.0)
days_to_new_tumor (%)	good	66 ( 51.6)	21 ( 44.7)	0.524		0.138	53.3
	poor	62 ( 48.4)	26 ( 55.3)
group (%)	testing datasets	0 ( 0.0)	112 (100.0)	<0.001		NaN	0
	training datasets	263 (100.0)	0 ( 0.0)
