# Supplementary material for: Tumor Immune Microenvironment Related Gene-Based Model to Predict Prognosis and Response to Compounds in Ovarian Cancer
Source: Frontiers journal article supplement (doi:10.3389/fonc.2021.807410), 2021-12-13
Supplement: Table_2.xls [file Table_2.xls]

## Sheet: TableS2
	event	time	riskScore	Risk	Group
TCGA-04-1331	1	1336	0.992927	high	testing cluster
TCGA-04-1343	1	361	1.30015	high	testing cluster
TCGA-04-1362	1	1348	1.60885	high	testing cluster
TCGA-04-1542	1	2561	0.914842	low	testing cluster
TCGA-04-1655	1	1380	1.48933	high	testing cluster
TCGA-09-0369	1	1082	2.51288	high	testing cluster
TCGA-09-1659	1	304	0.717168	low	testing cluster
TCGA-09-1661	1	1169	0.977664	high	testing cluster
TCGA-09-1662	1	2717	0.804564	low	testing cluster
TCGA-09-1666	0	1752	-0.278585	low	testing cluster
TCGA-09-2048	1	138	1.01412	high	testing cluster
TCGA-09-2056	0	379	1.82807	high	testing cluster
TCGA-13-0714	1	189	1.02467	high	testing cluster
TCGA-13-0724	1	83	1.28224	high	testing cluster
TCGA-13-0725	1	377	0.893416	low	testing cluster
TCGA-13-0727	1	462	1.87971	high	testing cluster
TCGA-13-0766	1	1725	1.15559	high	testing cluster
TCGA-13-0768	1	1784	0.529063	low	testing cluster
TCGA-13-0795	1	619	1.1379	high	testing cluster
TCGA-13-0886	0	4665	0.680703	low	testing cluster
TCGA-13-0887	1	2028	0.722019	low	testing cluster
TCGA-13-0888	1	2811	1.23009	high	testing cluster
TCGA-13-0893	1	1319	2.06457	high	testing cluster
TCGA-13-0900	0	4077	0.569413	low	testing cluster
TCGA-13-0901	0	589	0.751437	low	testing cluster
TCGA-13-0905	0	3746	-0.447854	low	testing cluster
TCGA-13-0906	0	3619	0.418654	low	testing cluster
TCGA-13-0908	1	1843	0.685286	low	testing cluster
TCGA-13-1403	1	2345	1.3174	high	testing cluster
TCGA-13-1483	1	895	1.13758	high	testing cluster
TCGA-13-1495	1	2749	0.945266	high	testing cluster
TCGA-13-1496	1	129	-0.262848	low	testing cluster
TCGA-13-1498	1	2012	0.749627	low	testing cluster
TCGA-13-1499	0	3500	0.421853	low	testing cluster
TCGA-13-1505	0	1998	1.04709	high	testing cluster
TCGA-13-1511	1	1650	1.44265	high	testing cluster
TCGA-23-1021	1	1446	2.03259	high	testing cluster
TCGA-23-1022	1	1511	0.930134	low	testing cluster
TCGA-23-1028	0	1503	-0.24002	low	testing cluster
TCGA-23-1030	0	886	0.392953	low	testing cluster
TCGA-23-1109	1	1562	0.936766	low	testing cluster
TCGA-23-1114	1	2089	1.39884	high	testing cluster
TCGA-23-1120	0	130	0.276132	low	testing cluster
TCGA-23-2077	0	3525	1.57157	high	testing cluster
TCGA-23-2078	0	2661	0.0958452	low	testing cluster
TCGA-24-0982	1	679	0.836792	low	testing cluster
TCGA-24-1103	1	1646	1.45951	high	testing cluster
TCGA-24-1105	1	1442	1.00813	high	testing cluster
TCGA-24-1413	0	192	0.895648	low	testing cluster
TCGA-24-1423	0	190	0.515699	low	testing cluster
TCGA-24-1426	0	163	1.55567	high	testing cluster
TCGA-24-1434	1	568	1.31511	high	testing cluster
TCGA-24-1435	1	1324	1.05862	high	testing cluster
TCGA-24-1467	1	3224	-0.0283852	low	testing cluster
TCGA-24-1471	0	36	0.528207	low	testing cluster
TCGA-24-1549	1	1721	1.89374	high	testing cluster
TCGA-24-1551	1	1579	1.19403	high	testing cluster
TCGA-24-1557	1	1213	1.28621	high	testing cluster
TCGA-24-1565	1	312	1.46632	high	testing cluster
TCGA-24-1567	1	524	1.2755	high	testing cluster
TCGA-24-1850	0	168	1.18762	high	testing cluster
TCGA-24-1923	1	690	1.34451	high	testing cluster
TCGA-24-2036	1	1947	0.612234	low	testing cluster
TCGA-24-2261	1	24	0.594553	low	testing cluster
TCGA-24-2281	0	1357	-0.0191102	low	testing cluster
TCGA-24-2288	1	25	0.324115	low	testing cluster
TCGA-24-2289	1	2049	1.16417	high	testing cluster
TCGA-24-2298	1	1620	1.70431	high	testing cluster
TCGA-25-1316	1	1279	0.014161	low	testing cluster
TCGA-25-1320	1	1155	0.721069	low	testing cluster
TCGA-25-1322	1	91	1.12196	high	testing cluster
TCGA-25-1323	1	395	1.80562	high	testing cluster
TCGA-25-1626	1	518	1.01697	high	testing cluster
TCGA-25-1627	1	394	1.31013	high	testing cluster
TCGA-25-1631	1	9	1.13445	high	testing cluster
TCGA-25-1634	1	1091	1.03982	high	testing cluster
TCGA-25-1870	1	455	0.762697	low	testing cluster
TCGA-25-2392	1	31	0.948102	high	testing cluster
TCGA-25-2396	1	92	0.607702	low	testing cluster
TCGA-25-2400	1	1278	0.395511	low	testing cluster
TCGA-25-2409	1	821	1.49012	high	testing cluster
TCGA-29-1694	1	1187	0.835385	low	testing cluster
TCGA-29-1703	1	1815	1.60169	high	testing cluster
TCGA-29-1707	0	1277	-0.133189	low	testing cluster
TCGA-29-1761	1	528	1.68824	high	testing cluster
TCGA-29-1766	1	1199	0.748152	low	testing cluster
TCGA-29-1768	1	952	0.867679	low	testing cluster
TCGA-29-1769	0	699	1.57556	high	testing cluster
TCGA-29-1770	0	741	1.9431	high	testing cluster
TCGA-29-1781	0	255	-0.133464	low	testing cluster
TCGA-29-1784	0	163	-0.0713711	low	testing cluster
TCGA-29-A5NZ	1	1088	0.553353	low	testing cluster
TCGA-30-1857	1	8	0.808148	low	testing cluster
TCGA-30-1866	1	1114	1.10098	high	testing cluster
TCGA-31-1953	0	204	0.781449	low	testing cluster
TCGA-57-1584	0	643	1.62654	high	testing cluster
TCGA-57-1585	1	53	1.0278	high	testing cluster
TCGA-57-1586	0	679	1.2683	high	testing cluster
TCGA-57-1993	0	763	1.35059	high	testing cluster
TCGA-59-2348	0	5481	0.477388	low	testing cluster
TCGA-59-2355	1	65	1.32826	high	testing cluster
TCGA-5X-AA5U	0	361	0.245414	low	testing cluster
TCGA-61-1907	0	952	-0.768514	low	testing cluster
TCGA-61-1995	0	61	0.675225	low	testing cluster
TCGA-61-1998	0	168	0.883146	low	testing cluster
TCGA-61-2008	0	932	0.801528	low	testing cluster
TCGA-61-2012	0	932	0.449812	low	testing cluster
TCGA-61-2097	0	1844	0.859521	low	testing cluster
TCGA-61-2098	0	1993	1.59443	high	testing cluster
TCGA-61-2111	0	3825	0.220821	low	testing cluster
TCGA-61-2113	1	676	-0.112935	low	testing cluster
TCGA-OY-A56Q	0	576	0.544674	low	testing cluster
TCGA-04-1332	1	1247	0.650168	low	training cluster
TCGA-04-1338	0	1418	0.612571	low	training cluster
TCGA-04-1341	0	33	1.23784	high	training cluster
TCGA-04-1347	0	1919	0.741015	low	training cluster
TCGA-04-1350	1	1946	1.44453	high	training cluster
TCGA-04-1356	1	1499	1.15821	high	training cluster
TCGA-04-1361	0	989	1.86184	high	training cluster
TCGA-04-1364	1	1024	1.89813	high	training cluster
TCGA-04-1365	0	2329	0.371895	low	training cluster
TCGA-04-1514	1	1720	1.50936	high	training cluster
TCGA-04-1519	0	24	2.01341	high	training cluster
TCGA-04-1530	1	3622	0.272754	low	training cluster
TCGA-04-1536	1	885	1.51281	high	training cluster
TCGA-04-1648	1	871	2.0695	high	training cluster
TCGA-04-1651	1	1102	1.02325	high	training cluster
TCGA-09-0364	1	887	1.25661	high	training cluster
TCGA-09-0366	1	1757	0.824193	low	training cluster
TCGA-09-0367	1	547	1.43162	high	training cluster
TCGA-09-1665	1	1266	0.479894	low	training cluster
TCGA-09-1667	0	1882	-0.31378	low	training cluster
TCGA-09-1668	0	1684	0.130613	low	training cluster
TCGA-09-1669	0	928	0.461749	low	training cluster
TCGA-09-1670	0	547	0.830107	low	training cluster
TCGA-09-1673	0	92	0.150071	low	training cluster
TCGA-09-2044	0	186	-0.0523328	low	training cluster
TCGA-09-2045	1	1069	0.611977	low	training cluster
TCGA-09-2051	0	1919	0.39564	low	training cluster
TCGA-09-2053	0	1209	0.819039	low	training cluster
TCGA-09-2054	1	637	0.844493	high	training cluster
TCGA-10-0927	1	2490	1.19038	high	training cluster
TCGA-10-0928	1	563	1.38798	high	training cluster
TCGA-10-0931	1	1000	0.71504	low	training cluster
TCGA-10-0933	1	446	1.6217	high	training cluster
TCGA-10-0936	1	1123	1.07422	high	training cluster
TCGA-10-0937	1	608	0.98152	high	training cluster
TCGA-10-0938	1	636	1.4018	high	training cluster
TCGA-13-0720	1	1355	0.80087	low	training cluster
TCGA-13-0726	1	949	1.12501	high	training cluster
TCGA-13-0730	1	542	1.32928	high	training cluster
TCGA-13-0762	0	3400	0.410731	low	training cluster
TCGA-13-0765	1	1389	1.29412	high	training cluster
TCGA-13-0797	0	2121	0.30179	low	training cluster
TCGA-13-0800	0	2661	1.24947	high	training cluster
TCGA-13-0804	1	1073	1.31647	high	training cluster
TCGA-13-0883	1	2097	1.36612	high	training cluster
TCGA-13-0884	1	3260	1.44358	high	training cluster
TCGA-13-0885	0	3388	0.413718	low	training cluster
TCGA-13-0891	1	3128	0.900381	high	training cluster
TCGA-13-0897	1	2182	1.06099	high	training cluster
TCGA-13-0911	1	1355	0.808393	low	training cluster
TCGA-13-0913	0	3325	0.118711	low	training cluster
TCGA-13-0916	0	1785	-0.619291	low	training cluster
TCGA-13-0920	1	1484	0.485772	low	training cluster
TCGA-13-0923	0	2547	1.25927	high	training cluster
TCGA-13-0924	0	2614	0.536304	low	training cluster
TCGA-13-1404	0	2469	0.45149	low	training cluster
TCGA-13-1405	1	868	1.54102	high	training cluster
TCGA-13-1407	0	2534	0.0629326	low	training cluster
TCGA-13-1408	1	1680	0.927938	high	training cluster
TCGA-13-1409	1	1742	1.42344	high	training cluster
TCGA-13-1410	0	2464	-0.00824125	low	training cluster
TCGA-13-1411	1	531	1.04522	high	training cluster
TCGA-13-1477	1	1662	0.937422	high	training cluster
TCGA-13-1485	1	629	1.95864	high	training cluster
TCGA-13-1487	1	681	1.56038	high	training cluster
TCGA-13-1488	1	2154	-0.248262	low	training cluster
TCGA-13-1489	1	2553	1.37178	high	training cluster
TCGA-13-1492	1	3819	1.18972	high	training cluster
TCGA-13-1497	0	3871	0.109097	low	training cluster
TCGA-13-1501	1	1314	1.32131	high	training cluster
TCGA-13-1506	1	1039	1.65085	high	training cluster
TCGA-13-1507	1	1993	0.45141	low	training cluster
TCGA-13-1509	0	2438	1.05014	high	training cluster
TCGA-13-1510	1	1359	0.378026	low	training cluster
TCGA-13-1512	0	442	0.925655	high	training cluster
TCGA-13-2060	0	2369	-0.293074	low	training cluster
TCGA-13-A5FT	0	2143	-0.293368	low	training cluster
TCGA-20-0987	1	701	1.64207	high	training cluster
TCGA-20-0991	0	797	0.380854	low	training cluster
TCGA-20-1682	0	837	0.617859	low	training cluster
TCGA-20-1683	0	772	0.015465	low	training cluster
TCGA-20-1686	0	89	-9.81e-05	low	training cluster
TCGA-20-1687	0	81	1.02489	high	training cluster
TCGA-23-1023	0	1233	0.221772	low	training cluster
TCGA-23-1024	0	468	-0.0815589	low	training cluster
TCGA-23-1026	0	816	1.01409	high	training cluster
TCGA-23-1027	1	976	1.13816	high	training cluster
TCGA-23-1029	0	268	0.417846	low	training cluster
TCGA-23-1107	1	9	1.05123	high	training cluster
TCGA-23-1110	0	1658	0.982468	high	training cluster
TCGA-23-1111	0	98	1.46012	high	training cluster
TCGA-23-1113	1	949	2.1311	high	training cluster
TCGA-23-1116	1	592	0.410943	low	training cluster
TCGA-23-1118	0	2616	0.498429	low	training cluster
TCGA-23-1119	0	3953	0.316815	low	training cluster
TCGA-23-1122	1	1189	1.10504	high	training cluster
TCGA-23-1123	1	1018	0.353776	low	training cluster
TCGA-23-1809	0	16	0.245778	low	training cluster
TCGA-23-2084	1	1516	1.31091	high	training cluster
TCGA-24-0966	0	232	0.426432	low	training cluster
TCGA-24-0968	1	598	1.04597	high	training cluster
TCGA-24-0970	1	354	2.11772	high	training cluster
TCGA-24-0979	1	1264	1.64104	high	training cluster
TCGA-24-1104	1	1933	0.850305	high	training cluster
TCGA-24-1416	0	194	1.20576	high	training cluster
TCGA-24-1417	0	238	0.2086	low	training cluster
TCGA-24-1418	0	243	0.306955	low	training cluster
TCGA-24-1419	0	239	0.348305	low	training cluster
TCGA-24-1422	1	23	1.55554	high	training cluster
TCGA-24-1424	0	183	0.257275	low	training cluster
TCGA-24-1425	0	181	1.2312	high	training cluster
TCGA-24-1427	0	147	1.32502	high	training cluster
TCGA-24-1428	0	529	-0.0619109	low	training cluster
TCGA-24-1430	1	863	1.3634	high	training cluster
TCGA-24-1431	1	567	0.998871	high	training cluster
TCGA-24-1464	1	379	0.761447	low	training cluster
TCGA-24-1469	0	277	0.343033	low	training cluster
TCGA-24-1470	0	105	0.115329	low	training cluster
TCGA-24-1474	1	676	1.51999	high	training cluster
TCGA-24-1544	1	820	0.832312	high	training cluster
TCGA-24-1546	1	1955	1.46835	high	training cluster
TCGA-24-1550	1	1249	0.816798	low	training cluster
TCGA-24-1552	1	1259	2.15675	high	training cluster
TCGA-24-1553	1	1767	1.11349	high	training cluster
TCGA-24-1558	1	594	1.50761	high	training cluster
TCGA-24-1560	1	1341	1.45971	high	training cluster
TCGA-24-1562	1	1384	1.77996	high	training cluster
TCGA-24-1563	1	1451	1.10925	high	training cluster
TCGA-24-1603	1	2742	0.800139	low	training cluster
TCGA-24-1604	1	2688	0.431508	low	training cluster
TCGA-24-1616	1	1163	1.23056	high	training cluster
TCGA-24-1842	0	253	0.666152	low	training cluster
TCGA-24-1843	0	106	1.04829	high	training cluster
TCGA-24-1844	0	113	2.15631	high	training cluster
TCGA-24-1845	0	116	0.0164975	low	training cluster
TCGA-24-1846	0	133	0.323203	low	training cluster
TCGA-24-1847	0	343	0.584797	low	training cluster
TCGA-24-1924	1	919	-0.211966	low	training cluster
TCGA-24-1928	1	336	0.577867	low	training cluster
TCGA-24-1930	1	2467	0.08145	low	training cluster
TCGA-24-2020	1	4624	0.539737	low	training cluster
TCGA-24-2023	1	1364	0.766801	low	training cluster
TCGA-24-2024	1	1769	1.28755	high	training cluster
TCGA-24-2026	1	1059	0.900693	high	training cluster
TCGA-24-2027	1	3337	0.780977	low	training cluster
TCGA-24-2033	1	562	1.373	high	training cluster
TCGA-24-2035	1	857	0.109896	low	training cluster
TCGA-24-2038	1	1354	0.917631	high	training cluster
TCGA-24-2254	1	1736	0.921549	high	training cluster
TCGA-24-2262	1	11	0.890414	high	training cluster
TCGA-24-2267	1	1446	0.610258	low	training cluster
TCGA-24-2271	1	962	0.763632	low	training cluster
TCGA-24-2280	0	2143	1.4382	high	training cluster
TCGA-24-2290	1	1102	0.481359	low	training cluster
TCGA-24-2293	1	506	0.459033	low	training cluster
TCGA-24-2297	1	1699	1.50762	high	training cluster
TCGA-25-1312	1	31	1.57287	high	training cluster
TCGA-25-1313	1	820	0.517365	low	training cluster
TCGA-25-1315	1	1583	0.650133	low	training cluster
TCGA-25-1317	1	61	0.792648	low	training cluster
TCGA-25-1318	1	1064	1.13834	high	training cluster
TCGA-25-1319	1	1977	0.740961	low	training cluster
TCGA-25-1321	1	1033	0.844507	high	training cluster
TCGA-25-1326	1	1249	0.681489	low	training cluster
TCGA-25-1328	1	2009	1.18812	high	training cluster
TCGA-25-1329	1	457	1.48086	high	training cluster
TCGA-25-1623	1	565	0.391526	low	training cluster
TCGA-25-1628	1	627	1.08085	high	training cluster
TCGA-25-1630	1	1162	0.423407	low	training cluster
TCGA-25-1632	1	1799	0.982011	high	training cluster
TCGA-25-1633	1	1891	0.825745	low	training cluster
TCGA-25-1635	1	1583	0.859047	high	training cluster
TCGA-25-1877	1	730	0.239475	low	training cluster
TCGA-25-2042	1	396	1.11335	high	training cluster
TCGA-25-2391	1	1492	0.574201	low	training cluster
TCGA-25-2393	1	1157	1.75251	high	training cluster
TCGA-25-2398	1	1369	0.516916	low	training cluster
TCGA-25-2399	1	608	1.56934	high	training cluster
TCGA-25-2401	1	90	0.353903	low	training cluster
TCGA-25-2404	1	883	0.969962	high	training cluster
TCGA-29-1688	1	2400	1.29046	high	training cluster
TCGA-29-1690	1	1448	1.48972	high	training cluster
TCGA-29-1691	1	1470	0.671175	low	training cluster
TCGA-29-1693	0	3096	0.679453	low	training cluster
TCGA-29-1695	1	1229	0.424927	low	training cluster
TCGA-29-1696	1	1032	1.45072	high	training cluster
TCGA-29-1697	1	949	2.12451	high	training cluster
TCGA-29-1701	1	515	0.617642	low	training cluster
TCGA-29-1705	1	555	1.54456	high	training cluster
TCGA-29-1710	1	951	1.25333	high	training cluster
TCGA-29-1711	0	1053	0.43055	low	training cluster
TCGA-29-1762	1	2634	1.13299	high	training cluster
TCGA-29-1763	0	2032	1.03346	high	training cluster
TCGA-29-1774	0	527	1.70581	high	training cluster
TCGA-29-1776	0	360	0.93784	high	training cluster
TCGA-29-1777	0	374	0.64354	low	training cluster
TCGA-29-1778	0	454	-0.403949	low	training cluster
TCGA-29-1783	0	220	0.490779	low	training cluster
TCGA-29-1785	1	1104	0.430743	low	training cluster
TCGA-29-2414	1	2621	1.72254	high	training cluster
TCGA-29-2425	0	1977	0.163469	low	training cluster
TCGA-29-2427	0	1900	0.642168	low	training cluster
TCGA-29-2428	0	1372	-0.0814232	low	training cluster
TCGA-30-1714	1	1158	1.78533	high	training cluster
TCGA-30-1718	1	1579	1.21474	high	training cluster
TCGA-30-1853	1	1103	0.978957	high	training cluster
TCGA-30-1860	1	1366	0.0377843	low	training cluster
TCGA-30-1861	1	1058	1.70889	high	training cluster
TCGA-30-1862	1	186	1.35779	high	training cluster
TCGA-30-1891	1	914	1.55564	high	training cluster
TCGA-30-1892	1	1484	1.62779	high	training cluster
TCGA-31-1944	0	1386	1.07713	high	training cluster
TCGA-31-1946	0	918	0.329752	low	training cluster
TCGA-31-1950	0	571	-0.042564	low	training cluster
TCGA-31-1951	0	684	0.382018	low	training cluster
TCGA-31-1956	0	1342	0.0415304	low	training cluster
TCGA-31-1959	0	67	0.410705	low	training cluster
TCGA-36-1568	0	875	0.154024	low	training cluster
TCGA-36-1569	0	885	0.545133	low	training cluster
TCGA-36-1570	0	655	0.41889	low	training cluster
TCGA-36-1571	1	695	1.15346	high	training cluster
TCGA-36-1574	0	686	0.406853	low	training cluster
TCGA-36-1576	0	915	0.776197	low	training cluster
TCGA-36-1577	0	783	1.77876	high	training cluster
TCGA-36-1580	1	737	0.68654	low	training cluster
TCGA-36-1581	0	751	0.00863649	low	training cluster
TCGA-57-1582	1	731	0.511462	low	training cluster
TCGA-57-1583	1	346	1.18886	high	training cluster
TCGA-57-1994	0	761	1.3656	high	training cluster
TCGA-59-2350	1	679	1.17545	high	training cluster
TCGA-59-2351	0	3532	0.114699	low	training cluster
TCGA-59-2352	1	286	0.684208	low	training cluster
TCGA-59-2354	1	1046	0.994287	high	training cluster
TCGA-59-2363	0	165	0.811653	low	training cluster
TCGA-59-A5PD	1	624	0.119683	low	training cluster
TCGA-61-1721	0	338	0.684628	low	training cluster
TCGA-61-1724	1	637	0.444245	low	training cluster
TCGA-61-1725	0	956	0.697603	low	training cluster
TCGA-61-1728	0	848	0.932265	high	training cluster
TCGA-61-1733	0	967	1.32507	high	training cluster
TCGA-61-1736	1	1484	1.10554	high	training cluster
TCGA-61-1737	0	1364	0.642632	low	training cluster
TCGA-61-1738	1	1089	1.42667	high	training cluster
TCGA-61-1741	1	1024	0.671701	low	training cluster
TCGA-61-1900	0	176	0.360019	low	training cluster
TCGA-61-1910	0	1127	-0.447108	low	training cluster
TCGA-61-1911	0	1293	1.17538	high	training cluster
TCGA-61-1914	0	1722	-0.22267	low	training cluster
TCGA-61-1918	1	479	0.46277	low	training cluster
TCGA-61-1919	1	1161	0.297169	low	training cluster
TCGA-61-2000	0	441	0.880452	high	training cluster
TCGA-61-2002	0	547	0.3939	low	training cluster
TCGA-61-2003	0	122	1.04929	high	training cluster
TCGA-61-2009	0	1212	0.781096	low	training cluster
TCGA-61-2088	0	145	1.80163	high	training cluster
TCGA-61-2092	0	1573	0.665209	low	training cluster
TCGA-61-2101	1	1688	0.830017	low	training cluster
TCGA-61-2102	1	197	2.09485	high	training cluster
TCGA-61-2104	0	2338	0.558298	low	training cluster
TCGA-61-2109	1	629	1.28057	high	training cluster
TCGA-61-2110	1	1354	1.29264	high	training cluster
TCGA-VG-A8LO	1	24	0.903232	high	training cluster
TCGA-WR-A838	1	304	0.40262	low	training cluster
