# Supplementary material for: Tumor Immune Microenvironment Related Gene-Based Model to Predict Prognosis and Response to Compounds in Ovarian Cancer
Source: Frontiers journal article supplement (doi:10.3389/fonc.2021.807410), 2021-12-13
Supplement: Table_3.xls [file Table_3.xls]

## Sheet: GO_risk
	ONTOLOGY	ID	Description	GeneRatio	BgRatio	pvalue	p.adjust	qvalue	geneID	Count
GO:0006959	BP	GO:0006959	humoral immune response	28/87	356/18670	4.38632e-27	5.75047e-24	4.25242e-24	CXCL11/CXCL10/CXCL9/CXCL13/LYZ/SH2D1A/IGLV2-14/IGHG1/IGKC/IGKV1-5/IGHV3-21/LTA/IGHV3-33/IGLV1-44/CCR2/IGLC2/IGHM/CCL13/IGHV3-15/IGLV1-47/IGLL5/IGLV1-51/IFNG/IGHV1-69-2/IGKV3-20/IGKV1-12/TRBC2/IGKV1-17	28
GO:0002460	BP	GO:0002460	adaptive immune response based on somatic recombination of immune receptors built from immunoglobulin superfamily domains	27/87	361/18670	1.65634e-25	1.08573e-22	8.02887e-23	CXCL13/IRF4/IGLV2-14/IGHG1/CD80/CD27/LY9/IGKC/IGKV1-5/IGHV3-21/LTA/IGHV3-33/IGLV1-44/CCR2/IGLC2/IGHM/IGHV3-15/IGLV1-47/IGLL5/IGLV1-51/SLAMF6/IGHV1-69-2/IGKV3-20/IGKV1-12/CCL19/TRBC2/IGKV1-17	27
GO:0002429	BP	GO:0002429	immune response-activating cell surface receptor signaling pathway	28/87	473/18670	1.1446e-23	3.75144e-21	2.77416e-21	CD38/LAX1/IGLV2-14/IGHG1/CLEC4E/CTLA4/TRBV7-9/IGKC/STAP1/IGKV1-5/IGHV3-21/IGHV3-33/IGLV1-44/IGLC2/IGHM/IGHV3-15/IGLV1-47/ITK/IGLL5/TRAC/TRAT1/IGLV1-51/IGHV1-69-2/ICAM3/IGKV3-20/IGKV1-12/TRBC2/IGKV1-17	28
GO:0002757	BP	GO:0002757	immune response-activating signal transduction	28/87	473/18670	1.1446e-23	3.75144e-21	2.77416e-21	CD38/LAX1/IGLV2-14/IGHG1/CLEC4E/CTLA4/TRBV7-9/IGKC/STAP1/IGKV1-5/IGHV3-21/IGHV3-33/IGLV1-44/IGLC2/IGHM/IGHV3-15/IGLV1-47/ITK/IGLL5/TRAC/TRAT1/IGLV1-51/IGHV1-69-2/ICAM3/IGKV3-20/IGKV1-12/TRBC2/IGKV1-17	28
GO:0002455	BP	GO:0002455	humoral immune response mediated by circulating immunoglobulin	19/87	150/18670	2.12566e-22	5.57348e-20	4.12154e-20	IGLV2-14/IGHG1/IGKC/IGKV1-5/IGHV3-21/LTA/IGHV3-33/IGLV1-44/IGLC2/IGHM/IGHV3-15/IGLV1-47/IGLL5/IGLV1-51/IGHV1-69-2/IGKV3-20/IGKV1-12/TRBC2/IGKV1-17	19
GO:0051249	BP	GO:0051249	regulation of lymphocyte activation	27/87	485/18670	4.20419e-22	9.18617e-20	6.79309e-20	PLA2G2D/ICOS/CD38/IRF4/LAX1/TIGIT/IGHG1/CD80/CD27/PDCD1LG2/CTLA4/IGKC/SIT1/IGHV3-21/IGHV3-33/CCR2/IGLC2/IGHM/IGHV3-15/IKZF3/MZB1/IGLL5/CD2/IFNG/IGHV1-69-2/CCL19/TRBC2	27
GO:0002449	BP	GO:0002449	lymphocyte mediated immunity	24/87	352/18670	1.08434e-21	2.03081e-19	1.50177e-19	SLAMF7/SH2D1A/IGLV2-14/IGHG1/CD27/IGKC/IGKV1-5/IGHV3-21/LTA/IGHV3-33/IGLV1-44/CCR2/IGLC2/IGHM/IGHV3-15/IGLV1-47/IGLL5/IGLV1-51/SLAMF6/IGHV1-69-2/IGKV3-20/IGKV1-12/TRBC2/IGKV1-17	24
GO:0006958	BP	GO:0006958	complement activation, classical pathway	18/87	137/18670	1.51053e-21	2.47537e-19	1.83052e-19	IGLV2-14/IGHG1/IGKC/IGKV1-5/IGHV3-21/IGHV3-33/IGLV1-44/IGLC2/IGHM/IGHV3-15/IGLV1-47/IGLL5/IGLV1-51/IGHV1-69-2/IGKV3-20/IGKV1-12/TRBC2/IGKV1-17	18
GO:0016064	BP	GO:0016064	immunoglobulin mediated immune response	20/87	218/18670	1.09674e-20	1.59758e-18	1.1814e-18	IGLV2-14/IGHG1/CD27/IGKC/IGKV1-5/IGHV3-21/LTA/IGHV3-33/IGLV1-44/IGLC2/IGHM/IGHV3-15/IGLV1-47/IGLL5/IGLV1-51/IGHV1-69-2/IGKV3-20/IGKV1-12/TRBC2/IGKV1-17	20
GO:0019724	BP	GO:0019724	B cell mediated immunity	20/87	221/18670	1.4447e-20	1.89401e-18	1.4006e-18	IGLV2-14/IGHG1/CD27/IGKC/IGKV1-5/IGHV3-21/LTA/IGHV3-33/IGLV1-44/IGLC2/IGHM/IGHV3-15/IGLV1-47/IGLL5/IGLV1-51/IGHV1-69-2/IGKV3-20/IGKV1-12/TRBC2/IGKV1-17	20
GO:0006909	BP	GO:0006909	phagocytosis	23/87	369/18670	6.54745e-20	7.80338e-18	5.77053e-18	SLAMF1/IGLV2-14/IGHG1/IL2RG/IGKC/STAP1/IGKV1-5/IGHV3-21/IGHV3-33/IGLV1-44/IGLC2/IGHM/IGHV3-15/IGLV1-47/IGLL5/IGLV1-51/IFNG/IGHV1-69-2/ICAM3/IGKV3-20/IGKV1-12/TRBC2/IGKV1-17	23
GO:0006956	BP	GO:0006956	complement activation	18/87	175/18670	1.40813e-19	1.53838e-17	1.13762e-17	IGLV2-14/IGHG1/IGKC/IGKV1-5/IGHV3-21/IGHV3-33/IGLV1-44/IGLC2/IGHM/IGHV3-15/IGLV1-47/IGLL5/IGLV1-51/IGHV1-69-2/IGKV3-20/IGKV1-12/TRBC2/IGKV1-17	18
GO:0002697	BP	GO:0002697	regulation of immune effector process	23/87	462/18670	9.72702e-18	9.80933e-16	7.25392e-16	IRF4/SH2D1A/IGLV2-14/IGHG1/CD80/IGKC/STAP1/IGKV1-5/LTA/IGHV3-33/IGLV1-44/CCR2/IGLC2/IGLV1-47/MZB1/IGLV1-51/SLAMF6/IFNG/IGKV3-20/IGKV1-12/CCL19/AIM2/IGKV1-17	23
GO:0002696	BP	GO:0002696	positive regulation of leukocyte activation	21/87	380/18670	3.88759e-17	3.64045e-15	2.69208e-15	ICOS/CD38/IGHG1/CD80/CD27/PDCD1LG2/CTLA4/IGKC/STAP1/IGHV3-21/IGHV3-33/CCR2/IGLC2/IGHM/IGHV3-15/IGLL5/CD2/IFNG/IGHV1-69-2/CCL19/TRBC2	21
GO:0050900	BP	GO:0050900	leukocyte migration	23/87	499/18670	5.26833e-17	4.60452e-15	3.405e-15	CXCL11/CXCL10/CXCL9/CXCL13/IGLV2-14/CCL8/IGKC/STAP1/IGKV1-5/CCL18/IGHV3-33/IGLV1-44/CCR2/IGLC2/IGHM/CCL13/IGLV1-47/IGLV1-51/CD2/IGKV3-20/IGKV1-12/CCL19/IGKV1-17	23
GO:0050867	BP	GO:0050867	positive regulation of cell activation	21/87	394/18670	8.08309e-17	6.62308e-15	4.89772e-15	ICOS/CD38/IGHG1/CD80/CD27/PDCD1LG2/CTLA4/IGKC/STAP1/IGHV3-21/IGHV3-33/CCR2/IGLC2/IGHM/IGHV3-15/IGLL5/CD2/IFNG/IGHV1-69-2/CCL19/TRBC2	21
GO:0051251	BP	GO:0051251	positive regulation of lymphocyte activation	19/87	334/18670	8.77609e-16	6.76792e-14	5.00482e-14	ICOS/CD38/IGHG1/CD80/CD27/PDCD1LG2/CTLA4/IGKC/IGHV3-21/IGHV3-33/CCR2/IGLC2/IGHM/IGHV3-15/IGLL5/IFNG/IGHV1-69-2/CCL19/TRBC2	19
GO:0050853	BP	GO:0050853	B cell receptor signaling pathway	14/87	129/18670	9.69876e-16	7.06393e-14	5.22372e-14	CD38/IGHG1/CTLA4/IGKC/STAP1/IGHV3-21/IGHV3-33/IGLC2/IGHM/IGHV3-15/ITK/IGLL5/IGHV1-69-2/TRBC2	14
GO:0002920	BP	GO:0002920	regulation of humoral immune response	14/87	134/18670	1.66813e-15	1.15101e-13	8.51164e-14	CXCL13/IGLV2-14/IGHG1/IGKC/IGKV1-5/LTA/IGHV3-33/IGLV1-44/IGLC2/IGLV1-47/IGLV1-51/IGKV3-20/IGKV1-12/IGKV1-17	14
GO:0050851	BP	GO:0050851	antigen receptor-mediated signaling pathway	18/87	316/18670	5.37147e-15	3.521e-13	2.60375e-13	CD38/LAX1/IGHG1/CTLA4/TRBV7-9/IGKC/STAP1/IGHV3-21/IGHV3-33/IGLC2/IGHM/IGHV3-15/ITK/IGLL5/TRAC/TRAT1/IGHV1-69-2/TRBC2	18
GO:0050864	BP	GO:0050864	regulation of B cell activation	15/87	184/18670	6.4033e-15	3.99749e-13	2.95611e-13	CD38/IGHG1/CD27/CTLA4/IGKC/IGHV3-21/IGHV3-33/IGLC2/IGHM/IGHV3-15/IKZF3/MZB1/IGLL5/IGHV1-69-2/TRBC2	15
GO:0038094	BP	GO:0038094	Fc-gamma receptor signaling pathway	13/87	142/18670	1.03198e-13	6.14965e-12	4.54762e-12	IGLV2-14/IGHG1/CLEC4E/IGKC/IGKV1-5/IGHV3-33/IGLV1-44/IGLC2/IGLV1-47/IGLV1-51/IGKV3-20/IGKV1-12/IGKV1-17	13
GO:0030449	BP	GO:0030449	regulation of complement activation	12/87	115/18670	1.99771e-13	1.1387e-11	8.42057e-12	IGLV2-14/IGHG1/IGKC/IGKV1-5/IGHV3-33/IGLV1-44/IGLC2/IGLV1-47/IGLV1-51/IGKV3-20/IGKV1-12/IGKV1-17	12
GO:0042110	BP	GO:0042110	T cell activation	19/87	464/18670	3.321e-13	1.8141e-11	1.34151e-11	PLA2G2D/ICOS/IRF4/LAX1/RHOH/TIGIT/CD80/CD27/PDCD1LG2/CLEC4E/LY9/CTLA4/SIT1/CCR2/ITK/CD2/SLAMF6/IFNG/CCL19	19
GO:0042113	BP	GO:0042113	B cell activation	16/87	310/18670	9.291e-13	4.8722e-11	3.60295e-11	CD38/LAX1/IGHG1/CD27/CTLA4/IGKC/IGHV3-21/IGHV3-33/IGLC2/IGHM/IGHV3-15/IKZF3/MZB1/IGLL5/IGHV1-69-2/TRBC2	16
GO:0002433	BP	GO:0002433	immune response-regulating cell surface receptor signaling pathway involved in phagocytosis	12/87	139/18670	1.97388e-12	9.5843e-11	7.08751e-11	IGLV2-14/IGHG1/IGKC/IGKV1-5/IGHV3-33/IGLV1-44/IGLC2/IGLV1-47/IGLV1-51/IGKV3-20/IGKV1-12/IGKV1-17	12
GO:0038096	BP	GO:0038096	Fc-gamma receptor signaling pathway involved in phagocytosis	12/87	139/18670	1.97388e-12	9.5843e-11	7.08751e-11	IGLV2-14/IGHG1/IGKC/IGKV1-5/IGHV3-33/IGLV1-44/IGLC2/IGLV1-47/IGLV1-51/IGKV3-20/IGKV1-12/IGKV1-17	12
GO:0042742	BP	GO:0042742	defense response to bacterium	16/87	330/18670	2.40714e-12	1.12706e-10	8.3345e-11	CXCL13/LYZ/IGHG1/CLEC4E/IGKC/IGHV3-21/LTA/IGHV3-33/IGLC2/IGHM/IGHV3-15/IGLL5/GBP4/IGHV1-69-2/IGKV3-20/TRBC2	16
GO:0050871	BP	GO:0050871	positive regulation of B cell activation	12/87	142/18670	2.54891e-12	1.15228e-10	8.52102e-11	CD38/IGHG1/CD27/IGKC/IGHV3-21/IGHV3-33/IGLC2/IGHM/IGHV3-15/IGLL5/IGHV1-69-2/TRBC2	12
GO:0002431	BP	GO:0002431	Fc receptor mediated stimulatory signaling pathway	12/87	145/18670	3.27237e-12	1.43003e-10	1.05749e-10	IGLV2-14/IGHG1/IGKC/IGKV1-5/IGHV3-33/IGLV1-44/IGLC2/IGLV1-47/IGLV1-51/IGKV3-20/IGKV1-12/IGKV1-17	12
GO:0030217	BP	GO:0030217	T cell differentiation	14/87	240/18670	5.418e-12	2.29129e-10	1.69439e-10	PLA2G2D/IRF4/RHOH/CD80/CD27/CLEC4E/LY9/CTLA4/CCR2/ITK/CD2/SLAMF6/IFNG/CCL19	14
GO:0038093	BP	GO:0038093	Fc receptor signaling pathway	14/87	241/18670	5.73098e-12	2.34791e-10	1.73626e-10	IGLV2-14/IGHG1/CLEC4E/IGKC/IGKV1-5/IGHV3-33/IGLV1-44/IGLC2/IGLV1-47/ITK/IGLV1-51/IGKV3-20/IGKV1-12/IGKV1-17	14
GO:0006910	BP	GO:0006910	phagocytosis, recognition	10/87	84/18670	5.91175e-12	2.34858e-10	1.73675e-10	IGHG1/IGKC/IGHV3-21/IGHV3-33/IGLC2/IGHM/IGHV3-15/IGLL5/IGHV1-69-2/TRBC2	10
GO:0006911	BP	GO:0006911	phagocytosis, engulfment	11/87	118/18670	7.47974e-12	2.8841e-10	2.13277e-10	IGHG1/IGKC/STAP1/IGHV3-21/IGHV3-33/IGLC2/IGHM/IGHV3-15/IGLL5/IGHV1-69-2/TRBC2	11
GO:0070098	BP	GO:0070098	chemokine-mediated signaling pathway	10/87	88/18670	9.52002e-12	3.56593e-10	2.63697e-10	CXCL11/CXCL10/CXCL9/CXCL13/CCL8/CXCR6/CCL18/CCR2/CCL13/CCL19	10
GO:0099024	BP	GO:0099024	plasma membrane invagination	11/87	127/18670	1.68109e-11	6.12196e-10	4.52714e-10	IGHG1/IGKC/STAP1/IGHV3-21/IGHV3-33/IGLC2/IGHM/IGHV3-15/IGLL5/IGHV1-69-2/TRBC2	11
GO:0038095	BP	GO:0038095	Fc-epsilon receptor signaling pathway	12/87	169/18670	2.01244e-11	7.13057e-10	5.273e-10	IGLV2-14/IGKC/IGKV1-5/IGHV3-33/IGLV1-44/IGLC2/IGLV1-47/ITK/IGLV1-51/IGKV3-20/IGKV1-12/IGKV1-17	12
GO:1990868	BP	GO:1990868	response to chemokine	10/87	97/18670	2.56423e-11	8.61975e-10	6.37423e-10	CXCL11/CXCL10/CXCL9/CXCL13/CCL8/CXCR6/CCL18/CCR2/CCL13/CCL19	10
GO:1990869	BP	GO:1990869	cellular response to chemokine	10/87	97/18670	2.56423e-11	8.61975e-10	6.37423e-10	CXCL11/CXCL10/CXCL9/CXCL13/CCL8/CXCR6/CCL18/CCR2/CCL13/CCL19	10
GO:0010324	BP	GO:0010324	membrane invagination	11/87	135/18670	3.28223e-11	1.07575e-09	7.9551e-10	IGHG1/IGKC/STAP1/IGHV3-21/IGHV3-33/IGLC2/IGHM/IGHV3-15/IGLL5/IGHV1-69-2/TRBC2	11
GO:0030098	BP	GO:0030098	lymphocyte differentiation	15/87	353/18670	8.05249e-11	2.57483e-09	1.90407e-09	PLA2G2D/IRF4/RHOH/CD80/CD27/CLEC4E/LY9/CTLA4/CCR2/IKZF3/ITK/CD2/SLAMF6/IFNG/CCL19	15
GO:0002377	BP	GO:0002377	immunoglobulin production	12/87	193/18670	9.5254e-11	2.97329e-09	2.19872e-09	LAX1/IGLV2-14/IGKC/IGKV1-5/IGLV1-44/IGKV1-8/IGLV1-47/MZB1/IGLV1-51/IGKV3-20/IGKV1-12/IGKV1-17	12
GO:0050863	BP	GO:0050863	regulation of T cell activation	14/87	314/18670	1.9473e-10	5.937e-09	4.39037e-09	PLA2G2D/ICOS/IRF4/LAX1/TIGIT/CD80/CD27/PDCD1LG2/CTLA4/SIT1/CCR2/CD2/IFNG/CCL19	14
GO:0048247	BP	GO:0048247	lymphocyte chemotaxis	8/87	64/18670	5.72822e-10	1.70675e-08	1.26213e-08	CXCL11/CXCL10/CXCL13/CCL8/CCL18/CCR2/CCL13/CCL19	8
GO:0002440	BP	GO:0002440	production of molecular mediator of immune response	13/87	286/18670	7.24772e-10	2.1115e-08	1.56144e-08	LAX1/IGLV2-14/IGKC/IGKV1-5/IGLV1-44/CCR2/IGKV1-8/IGLV1-47/MZB1/IGLV1-51/IGKV3-20/IGKV1-12/IGKV1-17	13
GO:0008037	BP	GO:0008037	cell recognition	11/87	215/18670	4.76043e-09	1.35672e-07	1.00329e-07	IGHG1/IGKC/IGHV3-21/IGHV3-33/IGLC2/IGHM/IGHV3-15/IGLL5/IGHV1-69-2/CCL19/TRBC2	11
GO:0046631	BP	GO:0046631	alpha-beta T cell activation	9/87	138/18670	1.59413e-08	4.44661e-07	3.28823e-07	PLA2G2D/IRF4/CD80/LY9/CCR2/ITK/SLAMF6/IFNG/CCL19	9
GO:0046632	BP	GO:0046632	alpha-beta T cell differentiation	8/87	101/18670	2.27495e-08	6.21345e-07	4.5948e-07	PLA2G2D/IRF4/CD80/LY9/ITK/SLAMF6/IFNG/CCL19	8
GO:0006898	BP	GO:0006898	receptor-mediated endocytosis	12/87	314/18670	2.38731e-08	6.38727e-07	4.72333e-07	IGLV2-14/IGKC/IGKV1-5/IGHV3-33/IGLV1-44/IGLC2/IGLV1-47/IGLV1-51/IGKV3-20/IGKV1-12/CCL19/IGKV1-17	12
GO:0030593	BP	GO:0030593	neutrophil chemotaxis	8/87	104/18670	2.86687e-08	7.38949e-07	5.46447e-07	CXCL11/CXCL10/CXCL9/CXCL13/CCL8/CCL18/CCL13/CCL19	8
GO:0002292	BP	GO:0002292	T cell differentiation involved in immune response	7/87	68/18670	2.87463e-08	7.38949e-07	5.46447e-07	IRF4/CD80/CLEC4E/LY9/SLAMF6/IFNG/CCL19	7
GO:0072676	BP	GO:0072676	lymphocyte migration	8/87	111/18670	4.78631e-08	1.2067e-06	8.92347e-07	CXCL11/CXCL10/CXCL13/CCL8/CCL18/CCR2/CCL13/CCL19	8
GO:0097529	BP	GO:0097529	myeloid leukocyte migration	10/87	210/18670	4.92558e-08	1.21838e-06	9.00985e-07	CXCL11/CXCL10/CXCL9/CXCL13/CCL8/STAP1/CCL18/CCR2/CCL13/CCL19	10
GO:0043367	BP	GO:0043367	CD4-positive, alpha-beta T cell differentiation	7/87	74/18670	5.21731e-08	1.26665e-06	9.36675e-07	PLA2G2D/IRF4/CD80/LY9/SLAMF6/IFNG/CCL19	7
GO:1990266	BP	GO:1990266	neutrophil migration	8/87	118/18670	7.72345e-08	1.84099e-06	1.3614e-06	CXCL11/CXCL10/CXCL9/CXCL13/CCL8/CCL18/CCL13/CCL19	8
GO:0070663	BP	GO:0070663	regulation of leukocyte proliferation	10/87	222/18670	8.30478e-08	1.94421e-06	1.43773e-06	PLA2G2D/CD38/CCL8/CD80/PDCD1LG2/CTLA4/CCR2/IKZF3/MZB1/CCL19	10
GO:0030595	BP	GO:0030595	leukocyte chemotaxis	10/87	224/18670	9.03259e-08	2.0775e-06	1.53629e-06	CXCL11/CXCL10/CXCL9/CXCL13/CCL8/STAP1/CCL18/CCR2/CCL13/CCL19	10
GO:0045619	BP	GO:0045619	regulation of lymphocyte differentiation	9/87	169/18670	9.23378e-08	2.08715e-06	1.54343e-06	IRF4/CD80/CD27/CTLA4/CCR2/IKZF3/CD2/IFNG/CCL19	9
GO:0019730	BP	GO:0019730	antimicrobial humoral response	8/87	122/18670	1.00141e-07	2.22517e-06	1.64549e-06	CXCL11/CXCL10/CXCL9/CXCL13/LYZ/IGHM/CCL13/IGKV3-20	8
GO:0071621	BP	GO:0071621	granulocyte chemotaxis	8/87	123/18670	1.06704e-07	2.33149e-06	1.72412e-06	CXCL11/CXCL10/CXCL9/CXCL13/CCL8/CCL18/CCL13/CCL19	8
GO:0060326	BP	GO:0060326	cell chemotaxis	11/87	304/18670	1.66167e-07	3.51363e-06	2.5983e-06	CXCL11/CXCL10/CXCL9/CXCL13/CCL8/CXCR6/STAP1/CCL18/CCR2/CCL13/CCL19	11
GO:1903037	BP	GO:1903037	regulation of leukocyte cell-cell adhesion	11/87	304/18670	1.66167e-07	3.51363e-06	2.5983e-06	PLA2G2D/ICOS/LAX1/TIGIT/CD80/CD27/PDCD1LG2/CTLA4/CCR2/IFNG/CCL19	11
GO:0006874	BP	GO:0006874	cellular calcium ion homeostasis	13/87	458/18670	1.93078e-07	4.01785e-06	2.97117e-06	CXCL11/CXCL10/CXCL9/CXCL13/CD38/P2RY10/CCL8/CXCR6/CCR2/CCL13/S1PR4/CCL19/GPR174	13
GO:0001819	BP	GO:0001819	positive regulation of cytokine production	13/87	464/18670	2.24104e-07	4.59063e-06	3.39473e-06	IRF4/GBP5/TIGIT/CD80/CLEC4E/LY9/LTA/CCR2/CD2/SLAMF6/IFNG/CCL19/AIM2	13
GO:0035710	BP	GO:0035710	CD4-positive, alpha-beta T cell activation	7/87	92/18670	2.3739e-07	4.78798e-06	3.54067e-06	PLA2G2D/IRF4/CD80/LY9/SLAMF6/IFNG/CCL19	7
GO:0055074	BP	GO:0055074	calcium ion homeostasis	13/87	471/18670	2.65906e-07	5.26528e-06	3.89363e-06	CXCL11/CXCL10/CXCL9/CXCL13/CD38/P2RY10/CCL8/CXCR6/CCR2/CCL13/S1PR4/CCL19/GPR174	13
GO:0007204	BP	GO:0007204	positive regulation of cytosolic calcium ion concentration	11/87	319/18670	2.69087e-07	5.26528e-06	3.89363e-06	CXCL11/CXCL10/CXCL9/CXCL13/CD38/P2RY10/CXCR6/CCR2/S1PR4/CCL19/GPR174	11
GO:0045580	BP	GO:0045580	regulation of T cell differentiation	8/87	139/18670	2.74602e-07	5.29416e-06	3.91499e-06	IRF4/CD80/CD27/CTLA4/CCR2/CD2/IFNG/CCL19	8
GO:0097530	BP	GO:0097530	granulocyte migration	8/87	141/18670	3.06444e-07	5.82244e-06	4.30564e-06	CXCL11/CXCL10/CXCL9/CXCL13/CCL8/CCL18/CCL13/CCL19	8
GO:0022407	BP	GO:0022407	regulation of cell-cell adhesion	12/87	402/18670	3.48798e-07	6.4958e-06	4.80359e-06	PLA2G2D/ICOS/CXCL13/LAX1/TIGIT/CD80/CD27/PDCD1LG2/CTLA4/CCR2/IFNG/CCL19	12
GO:0002294	BP	GO:0002294	CD4-positive, alpha-beta T cell differentiation involved in immune response	6/87	60/18670	3.51794e-07	6.4958e-06	4.80359e-06	IRF4/CD80/LY9/SLAMF6/IFNG/CCL19	6
GO:0034341	BP	GO:0034341	response to interferon-gamma	9/87	199/18670	3.70934e-07	6.75409e-06	4.9946e-06	IRF4/UBD/GBP5/CCL8/CCL18/CCL13/GBP4/IFNG/CCL19	9
GO:0002287	BP	GO:0002287	alpha-beta T cell activation involved in immune response	6/87	61/18670	3.88722e-07	6.88669e-06	5.09265e-06	IRF4/CD80/LY9/SLAMF6/IFNG/CCL19	6
GO:0002293	BP	GO:0002293	alpha-beta T cell differentiation involved in immune response	6/87	61/18670	3.88722e-07	6.88669e-06	5.09265e-06	IRF4/CD80/LY9/SLAMF6/IFNG/CCL19	6
GO:0072503	BP	GO:0072503	cellular divalent inorganic cation homeostasis	13/87	493/18670	4.46687e-07	7.80808e-06	5.77401e-06	CXCL11/CXCL10/CXCL9/CXCL13/CD38/P2RY10/CCL8/CXCR6/CCR2/CCL13/S1PR4/CCL19/GPR174	13
GO:0007159	BP	GO:0007159	leukocyte cell-cell adhesion	11/87	337/18670	4.64279e-07	8.00881e-06	5.92245e-06	PLA2G2D/ICOS/LAX1/TIGIT/CD80/CD27/PDCD1LG2/CTLA4/CCR2/IFNG/CCL19	11
GO:0050670	BP	GO:0050670	regulation of lymphocyte proliferation	9/87	208/18670	5.38186e-07	9.16315e-06	6.77607e-06	PLA2G2D/CD38/CD80/PDCD1LG2/CTLA4/CCR2/IKZF3/MZB1/CCL19	9
GO:0032944	BP	GO:0032944	regulation of mononuclear cell proliferation	9/87	209/18670	5.60286e-07	9.41711e-06	6.96388e-06	PLA2G2D/CD38/CD80/PDCD1LG2/CTLA4/CCR2/IKZF3/MZB1/CCL19	9
GO:0002548	BP	GO:0002548	monocyte chemotaxis	6/87	65/18670	5.69718e-07	9.45443e-06	6.99148e-06	CXCL10/CCL8/CCL18/CCR2/CCL13/CCL19	6
GO:0002286	BP	GO:0002286	T cell activation involved in immune response	7/87	106/18670	6.26571e-07	1.02679e-05	7.59306e-06	IRF4/CD80/CLEC4E/LY9/SLAMF6/IFNG/CCL19	7
GO:0051480	BP	GO:0051480	regulation of cytosolic calcium ion concentration	11/87	357/18670	8.19481e-07	1.32432e-05	9.79326e-06	CXCL11/CXCL10/CXCL9/CXCL13/CD38/P2RY10/CXCR6/CCR2/S1PR4/CCL19/GPR174	11
GO:0002699	BP	GO:0002699	positive regulation of immune effector process	9/87	219/18670	8.28333e-07	1.32432e-05	9.79326e-06	SH2D1A/CD80/STAP1/LTA/CCR2/MZB1/SLAMF6/IFNG/CCL19	9
GO:0070661	BP	GO:0070661	leukocyte proliferation	10/87	298/18670	1.24874e-06	1.9724e-05	1.45858e-05	PLA2G2D/CD38/CCL8/CD80/PDCD1LG2/CTLA4/CCR2/IKZF3/MZB1/CCL19	10
GO:0071346	BP	GO:0071346	cellular response to interferon-gamma	8/87	180/18670	1.95093e-06	3.04485e-05	2.25164e-05	IRF4/GBP5/CCL8/CCL18/CCL13/GBP4/IFNG/CCL19	8
GO:0022409	BP	GO:0022409	positive regulation of cell-cell adhesion	9/87	255/18670	2.91322e-06	4.49322e-05	3.3227e-05	ICOS/CXCL13/CD80/CD27/PDCD1LG2/CTLA4/CCR2/IFNG/CCL19	9
GO:0071674	BP	GO:0071674	mononuclear cell migration	6/87	90/18670	3.91325e-06	5.96543e-05	4.41139e-05	CXCL10/CCL8/CCL18/CCR2/CCL13/CCL19	6
GO:0006968	BP	GO:0006968	cellular defense response	5/87	52/18670	4.27901e-06	6.44803e-05	4.76826e-05	CXCL9/SH2D1A/CCR2/ITK/TRAT1	5
GO:0050870	BP	GO:0050870	positive regulation of T cell activation	8/87	202/18670	4.59649e-06	6.84772e-05	5.06384e-05	ICOS/CD80/CD27/PDCD1LG2/CTLA4/CCR2/IFNG/CCL19	8
GO:0046651	BP	GO:0046651	lymphocyte proliferation	9/87	272/18670	4.92804e-06	7.17851e-05	5.30845e-05	PLA2G2D/CD38/CD80/PDCD1LG2/CTLA4/CCR2/IKZF3/MZB1/CCL19	9
GO:1902105	BP	GO:1902105	regulation of leukocyte differentiation	9/87	272/18670	4.92804e-06	7.17851e-05	5.30845e-05	IRF4/CD80/CD27/CTLA4/CCR2/IKZF3/CD2/IFNG/CCL19	9
GO:0032943	BP	GO:0032943	mononuclear cell proliferation	9/87	274/18670	5.22947e-06	7.53389e-05	5.57125e-05	PLA2G2D/CD38/CD80/PDCD1LG2/CTLA4/CCR2/IKZF3/MZB1/CCL19	9
GO:0031295	BP	GO:0031295	T cell costimulation	5/87	56/18670	6.19775e-06	8.83179e-05	6.53103e-05	ICOS/CD80/PDCD1LG2/CTLA4/CCL19	5
GO:0031294	BP	GO:0031294	lymphocyte costimulation	5/87	57/18670	6.76889e-06	9.54195e-05	7.05619e-05	ICOS/CD80/PDCD1LG2/CTLA4/CCL19	5
GO:0042093	BP	GO:0042093	T-helper cell differentiation	5/87	58/18670	7.38043e-06	0.000102933	7.61184e-05	IRF4/CD80/LY9/SLAMF6/CCL19	5
GO:1903039	BP	GO:1903039	positive regulation of leukocyte cell-cell adhesion	8/87	218/18670	8.04661e-06	0.000111043	8.21155e-05	ICOS/CD80/CD27/PDCD1LG2/CTLA4/CCR2/IFNG/CCL19	8
GO:0001773	BP	GO:0001773	myeloid dendritic cell activation	4/87	28/18670	8.26806e-06	0.000111747	8.26357e-05	IRF4/SLAMF1/UBD/CD2	4
GO:0010818	BP	GO:0010818	T cell chemotaxis	4/87	28/18670	8.26806e-06	0.000111747	8.26357e-05	CXCL11/CXCL10/CXCL13/CCR2	4
GO:0031349	BP	GO:0031349	positive regulation of defense response	10/87	384/18670	1.17914e-05	0.000157741	0.000116648	SH2D1A/GBP5/CLEC4E/STAP1/CCL18/LTA/CCR2/SLAMF6/ICAM3/AIM2	10
GO:0001906	BP	GO:0001906	cell killing	7/87	168/18670	1.34545e-05	0.00017817	0.000131756	SLAMF7/LYZ/SH2D1A/STAP1/CCL13/SLAMF6/IFNG	7
GO:0050868	BP	GO:0050868	negative regulation of T cell activation	6/87	112/18670	1.38567e-05	0.000181662	0.000134337	PLA2G2D/LAX1/TIGIT/CD80/PDCD1LG2/CTLA4	6
GO:0032609	BP	GO:0032609	interferon-gamma production	6/87	113/18670	1.45795e-05	0.000189245	0.000139945	PDCD1LG2/LTA/CCR2/ITK/CD2/SLAMF6	6
GO:0034612	BP	GO:0034612	response to tumor necrosis factor	9/87	312/18670	1.48207e-05	0.00019049	0.000140866	UBD/CCL8/CD27/TNFRSF9/CCL18/LTA/CCL13/CCL19/AIM2	9
GO:0002695	BP	GO:0002695	negative regulation of leukocyte activation	7/87	175/18670	1.75309e-05	0.000223136	0.000165007	PLA2G2D/LAX1/TIGIT/CD80/PDCD1LG2/CTLA4/CCR2	7
GO:0072540	BP	GO:0072540	T-helper 17 cell lineage commitment	3/87	12/18670	2.08589e-05	0.000262943	0.000194444	IRF4/LY9/SLAMF6	3
GO:0002285	BP	GO:0002285	lymphocyte activation involved in immune response	7/87	181/18670	2.17919e-05	0.000272087	0.000201206	IRF4/CD80/CLEC4E/LY9/SLAMF6/IFNG/CCL19	7
GO:0061844	BP	GO:0061844	antimicrobial humoral immune response mediated by antimicrobial peptide	5/87	73/18670	2.29029e-05	0.000283262	0.00020947	CXCL11/CXCL10/CXCL9/CXCL13/CCL13	5
GO:1903038	BP	GO:1903038	negative regulation of leukocyte cell-cell adhesion	6/87	129/18670	3.09309e-05	0.000378976	0.00028025	PLA2G2D/LAX1/TIGIT/CD80/PDCD1LG2/CTLA4	6
GO:0070664	BP	GO:0070664	negative regulation of leukocyte proliferation	5/87	78/18670	3.16077e-05	0.000383682	0.00028373	PLA2G2D/CCL8/CD80/PDCD1LG2/CTLA4	5
GO:0050866	BP	GO:0050866	negative regulation of cell activation	7/87	199/18670	3.99849e-05	0.000480919	0.000355636	PLA2G2D/LAX1/TIGIT/CD80/PDCD1LG2/CTLA4/CCR2	7
GO:0071222	BP	GO:0071222	cellular response to lipopolysaccharide	7/87	205/18670	4.82851e-05	0.000575471	0.000425556	CXCL11/CXCL10/CXCL9/CXCL13/CD80/PDCD1LG2/STAP1	7
GO:0002295	BP	GO:0002295	T-helper cell lineage commitment	3/87	16/18670	5.23837e-05	0.000618694	0.000457519	IRF4/LY9/SLAMF6	3
GO:0071219	BP	GO:0071219	cellular response to molecule of bacterial origin	7/87	212/18670	5.9704e-05	0.000698857	0.000516799	CXCL11/CXCL10/CXCL9/CXCL13/CD80/PDCD1LG2/STAP1	7
GO:0051250	BP	GO:0051250	negative regulation of lymphocyte activation	6/87	146/18670	6.1891e-05	0.000718045	0.000530988	PLA2G2D/LAX1/TIGIT/CD80/PDCD1LG2/CTLA4	6
GO:0010819	BP	GO:0010819	regulation of T cell chemotaxis	3/87	17/18670	6.33946e-05	0.000719652	0.000532177	CXCL10/CXCL13/CCR2	3
GO:0043373	BP	GO:0043373	CD4-positive, alpha-beta T cell lineage commitment	3/87	17/18670	6.33946e-05	0.000719652	0.000532177	IRF4/LY9/SLAMF6	3
GO:0071356	BP	GO:0071356	cellular response to tumor necrosis factor	8/87	291/18670	6.36763e-05	0.000719652	0.000532177	CCL8/CD27/TNFRSF9/CCL18/LTA/CCL13/CCL19/AIM2	8
GO:0043370	BP	GO:0043370	regulation of CD4-positive, alpha-beta T cell differentiation	4/87	47/18670	6.73267e-05	0.000754404	0.000557876	IRF4/CD80/IFNG/CCL19	4
GO:0046634	BP	GO:0046634	regulation of alpha-beta T cell activation	5/87	93/18670	7.3667e-05	0.000818453	0.000605239	IRF4/CD80/CCR2/IFNG/CCL19	5
GO:0042129	BP	GO:0042129	regulation of T cell proliferation	6/87	156/18670	8.93488e-05	0.000980302	0.000724925	PLA2G2D/CD80/PDCD1LG2/CTLA4/CCR2/CCL19	6
GO:0002363	BP	GO:0002363	alpha-beta T cell lineage commitment	3/87	19/18670	8.97302e-05	0.000980302	0.000724925	IRF4/LY9/SLAMF6	3
GO:0002827	BP	GO:0002827	positive regulation of T-helper 1 type immune response	3/87	20/18670	0.00010521	0.00113057	0.000836049	CD80/CCR2/CCL19	3
GO:0043369	BP	GO:0043369	CD4-positive or CD8-positive, alpha-beta T cell lineage commitment	3/87	20/18670	0.00010521	0.00113057	0.000836049	IRF4/LY9/SLAMF6	3
GO:0045785	BP	GO:0045785	positive regulation of cell adhesion	9/87	403/18670	0.000108018	0.00115132	0.000851389	ICOS/CXCL13/CD80/CD27/PDCD1LG2/CTLA4/CCR2/IFNG/CCL19	9
GO:0032649	BP	GO:0032649	regulation of interferon-gamma production	5/87	101/18670	0.000109047	0.00115291	0.000852566	PDCD1LG2/LTA/CCR2/CD2/SLAMF6	5
GO:0032655	BP	GO:0032655	regulation of interleukin-12 production	4/87	54/18670	0.000116447	0.00121539	0.000898768	SLAMF1/TIGIT/IFNG/CCL19	4
GO:0071216	BP	GO:0071216	cellular response to biotic stimulus	7/87	236/18670	0.000116811	0.00121539	0.000898768	CXCL11/CXCL10/CXCL9/CXCL13/CD80/PDCD1LG2/STAP1	7
GO:0032615	BP	GO:0032615	interleukin-12 production	4/87	56/18670	0.000134285	0.0013862	0.00102509	SLAMF1/TIGIT/IFNG/CCL19	4
GO:0032496	BP	GO:0032496	response to lipopolysaccharide	8/87	330/18670	0.000152128	0.00155812	0.00115222	CXCL11/CXCL10/CXCL9/CXCL13/CD80/PDCD1LG2/STAP1/LTA	8
GO:0042130	BP	GO:0042130	negative regulation of T cell proliferation	4/87	59/18670	0.00016464	0.0016732	0.00123732	PLA2G2D/CD80/PDCD1LG2/CTLA4	4
GO:0030888	BP	GO:0030888	regulation of B cell proliferation	4/87	61/18670	0.000187446	0.00187589	0.0013872	CD38/CTLA4/IKZF3/MZB1	4
GO:2000514	BP	GO:2000514	regulation of CD4-positive, alpha-beta T cell activation	4/87	61/18670	0.000187446	0.00187589	0.0013872	IRF4/CD80/IFNG/CCL19	4
GO:0002688	BP	GO:0002688	regulation of leukocyte chemotaxis	5/87	114/18670	0.000192755	0.0019144	0.00141569	CXCL10/CXCL13/STAP1/CCR2/CCL19	5
GO:0022408	BP	GO:0022408	negative regulation of cell-cell adhesion	6/87	180/18670	0.000195459	0.00192666	0.00142475	PLA2G2D/LAX1/TIGIT/CD80/PDCD1LG2/CTLA4	6
GO:0002237	BP	GO:0002237	response to molecule of bacterial origin	8/87	343/18670	0.000197981	0.00193696	0.00143237	CXCL11/CXCL10/CXCL9/CXCL13/CD80/PDCD1LG2/STAP1/LTA	8
GO:0046635	BP	GO:0046635	positive regulation of alpha-beta T cell activation	4/87	62/18670	0.000199665	0.00193897	0.00143385	CD80/CCR2/IFNG/CCL19	4
GO:0046637	BP	GO:0046637	regulation of alpha-beta T cell differentiation	4/87	63/18670	0.000212448	0.00204793	0.00151443	IRF4/CD80/IFNG/CCL19	4
GO:0042098	BP	GO:0042098	T cell proliferation	6/87	184/18670	0.00022014	0.00210659	0.00155781	PLA2G2D/CD80/PDCD1LG2/CTLA4/CCR2/CCL19	6
GO:0002360	BP	GO:0002360	T cell lineage commitment	3/87	26/18670	0.000235151	0.00221786	0.00164009	IRF4/LY9/SLAMF6	3
GO:0072539	BP	GO:0072539	T-helper 17 cell differentiation	3/87	26/18670	0.000235151	0.00221786	0.00164009	IRF4/LY9/SLAMF6	3
GO:0032729	BP	GO:0032729	positive regulation of interferon-gamma production	4/87	65/18670	0.000239767	0.00222932	0.00164856	LTA/CCR2/CD2/SLAMF6	4
GO:0072678	BP	GO:0072678	T cell migration	4/87	65/18670	0.000239767	0.00222932	0.00164856	CXCL11/CXCL10/CXCL13/CCR2	4
GO:0002825	BP	GO:0002825	regulation of T-helper 1 type immune response	3/87	27/18670	0.000263656	0.00241715	0.00178746	CD80/CCR2/CCL19	3
GO:1901623	BP	GO:1901623	regulation of lymphocyte chemotaxis	3/87	27/18670	0.000263656	0.00241715	0.00178746	CXCL10/CXCL13/CCR2	3
GO:0042108	BP	GO:0042108	positive regulation of cytokine biosynthetic process	4/87	67/18670	0.000269526	0.00245381	0.00181457	IRF4/CD80/CCR2/IFNG	4
GO:0031343	BP	GO:0031343	positive regulation of cell killing	4/87	68/18670	0.00028536	0.00258005	0.00190792	SH2D1A/STAP1/SLAMF6/IFNG	4
GO:0002685	BP	GO:0002685	regulation of leukocyte migration	6/87	196/18670	0.000309207	0.00277651	0.00205321	CXCL10/CXCL13/CCL8/STAP1/CCR2/CCL19	6
GO:0072538	BP	GO:0072538	T-helper 17 type immune response	3/87	29/18670	0.000327158	0.00291771	0.00215762	IRF4/LY9/SLAMF6	3
GO:0002687	BP	GO:0002687	positive regulation of leukocyte migration	5/87	128/18670	0.000330119	0.00292423	0.00216245	CXCL10/CXCL13/CCL8/CCR2/CCL19	5
GO:0050671	BP	GO:0050671	positive regulation of lymphocyte proliferation	5/87	130/18670	0.000354578	0.00311981	0.00230708	CD38/CD80/PDCD1LG2/CCR2/CCL19	5
GO:0032743	BP	GO:0032743	positive regulation of interleukin-2 production	3/87	30/18670	0.000362288	0.00314542	0.00232602	IRF4/CD80/CCR2	3
GO:0043372	BP	GO:0043372	positive regulation of CD4-positive, alpha-beta T cell differentiation	3/87	30/18670	0.000362288	0.00314542	0.00232602	CD80/IFNG/CCL19	3
GO:1903706	BP	GO:1903706	regulation of hemopoiesis	9/87	475/18670	0.000366355	0.00314734	0.00232744	IRF4/CD80/CD27/CTLA4/CCR2/IKZF3/CD2/IFNG/CCL19	9
GO:0032946	BP	GO:0032946	positive regulation of mononuclear cell proliferation	5/87	131/18670	0.00036731	0.00314734	0.00232744	CD38/CD80/PDCD1LG2/CCR2/CCL19	5
GO:0032945	BP	GO:0032945	negative regulation of mononuclear cell proliferation	4/87	73/18670	0.000374698	0.00316922	0.00234361	PLA2G2D/CD80/PDCD1LG2/CTLA4	4
GO:0050672	BP	GO:0050672	negative regulation of lymphocyte proliferation	4/87	73/18670	0.000374698	0.00316922	0.00234361	PLA2G2D/CD80/PDCD1LG2/CTLA4	4
GO:2000406	BP	GO:2000406	positive regulation of T cell migration	3/87	31/18670	0.000399757	0.00335906	0.002484	CXCL10/CXCL13/CCR2	3
GO:0007162	BP	GO:0007162	negative regulation of cell adhesion	7/87	289/18670	0.000402268	0.00335906	0.002484	PLA2G2D/ADAMDEC1/LAX1/TIGIT/CD80/PDCD1LG2/CTLA4	7
GO:0050715	BP	GO:0050715	positive regulation of cytokine secretion	5/87	139/18670	0.000482023	0.00397441	0.00293905	CLEC4E/CD2/IFNG/CCL19/AIM2	5
GO:0070665	BP	GO:0070665	positive regulation of leukocyte proliferation	5/87	139/18670	0.000482023	0.00397441	0.00293905	CD38/CD80/PDCD1LG2/CCR2/CCL19	5
GO:0045089	BP	GO:0045089	positive regulation of innate immune response	6/87	214/18670	0.000493321	0.00404215	0.00298914	SH2D1A/GBP5/CLEC4E/SLAMF6/ICAM3/AIM2	6
GO:0032660	BP	GO:0032660	regulation of interleukin-17 production	3/87	34/18670	0.000526838	0.00423733	0.00313347	LY9/SLAMF6/IFNG	3
GO:0043368	BP	GO:0043368	positive T cell selection	3/87	34/18670	0.000526838	0.00423733	0.00313347	IRF4/LY9/SLAMF6	3
GO:0045066	BP	GO:0045066	regulatory T cell differentiation	3/87	34/18670	0.000526838	0.00423733	0.00313347	PLA2G2D/CTLA4/IFNG	3
GO:0045088	BP	GO:0045088	regulation of innate immune response	7/87	305/18670	0.000554688	0.00443412	0.00327899	SH2D1A/GBP5/CLEC4E/SLAMF6/IFNG/ICAM3/AIM2	7
GO:1904064	BP	GO:1904064	positive regulation of cation transmembrane transport	5/87	144/18670	0.000566267	0.00449925	0.00332716	CXCL11/CXCL10/CXCL9/CCR2/IFNG	5
GO:0045622	BP	GO:0045622	regulation of T-helper cell differentiation	3/87	35/18670	0.000574296	0.00453556	0.00335401	IRF4/CD80/CCL19	3
GO:0045582	BP	GO:0045582	positive regulation of T cell differentiation	4/87	83/18670	0.000610639	0.0047937	0.0035449	CD80/CD27/IFNG/CCL19	4
GO:2000516	BP	GO:2000516	positive regulation of CD4-positive, alpha-beta T cell activation	3/87	36/18670	0.000624403	0.00487257	0.00360323	CD80/IFNG/CCL19	3
GO:2000403	BP	GO:2000403	positive regulation of lymphocyte migration	3/87	37/18670	0.000677218	0.00525345	0.00388488	CXCL10/CXCL13/CCR2	3
GO:0032760	BP	GO:0032760	positive regulation of tumor necrosis factor production	4/87	86/18670	0.000698216	0.00538448	0.00398178	CCR2/CD2/IFNG/CCL19	4
GO:0002690	BP	GO:0002690	positive regulation of leukocyte chemotaxis	4/87	87/18670	0.000729286	0.00558547	0.00413041	CXCL10/CXCL13/CCR2/CCL19	4
GO:0032620	BP	GO:0032620	interleukin-17 production	3/87	38/18670	0.0007328	0.00558547	0.00413041	LY9/SLAMF6/IFNG	3
GO:0050729	BP	GO:0050729	positive regulation of inflammatory response	5/87	153/18670	0.000745208	0.00564721	0.00417606	GBP5/STAP1/CCL18/LTA/CCR2	5
GO:1903557	BP	GO:1903557	positive regulation of tumor necrosis factor superfamily cytokine production	4/87	88/18670	0.00076132	0.00573616	0.00424184	CCR2/CD2/IFNG/CCL19	4
GO:0009615	BP	GO:0009615	response to virus	7/87	323/18670	0.000777797	0.00582681	0.00430888	CXCL10/CXCL9/CCL8/APOBEC3A/IFNG/CCL19/AIM2	7
GO:0034767	BP	GO:0034767	positive regulation of ion transmembrane transport	5/87	156/18670	0.000813334	0.00605841	0.00448015	CXCL11/CXCL10/CXCL9/CCR2/IFNG	5
GO:0051281	BP	GO:0051281	positive regulation of release of sequestered calcium ion into cytosol	3/87	40/18670	0.000852489	0.0063142	0.0046693	CXCL11/CXCL10/CXCL9	3
GO:0050663	BP	GO:0050663	cytokine secretion	6/87	240/18670	0.00089856	0.00661804	0.00489399	GBP5/CLEC4E/CD2/IFNG/CCL19/AIM2	6
GO:0032680	BP	GO:0032680	regulation of tumor necrosis factor production	5/87	160/18670	0.000911273	0.00667419	0.00493551	SLAMF1/CCR2/CD2/IFNG/CCL19	5
GO:0045625	BP	GO:0045625	regulation of T-helper 1 cell differentiation	2/87	10/18670	0.00094279	0.00686665	0.00507783	CD80/CCL19	2
GO:0002683	BP	GO:0002683	negative regulation of immune system process	8/87	435/18670	0.000953991	0.00690985	0.00510977	PLA2G2D/LAX1/TIGIT/CD80/PDCD1LG2/CTLA4/STAP1/CCR2	8
GO:0045621	BP	GO:0045621	positive regulation of lymphocyte differentiation	4/87	94/18670	0.000974745	0.00701776	0.00518957	CD80/CD27/IFNG/CCL19	4
GO:0097028	BP	GO:0097028	dendritic cell differentiation	3/87	42/18670	0.000983916	0.00701776	0.00518957	IRF4/UBD/CCL19	3
GO:0032640	BP	GO:0032640	tumor necrosis factor production	5/87	163/18670	0.000990301	0.00701776	0.00518957	SLAMF1/CCR2/CD2/IFNG/CCL19	5
GO:1903555	BP	GO:1903555	regulation of tumor necrosis factor superfamily cytokine production	5/87	163/18670	0.000990301	0.00701776	0.00518957	SLAMF1/CCR2/CD2/IFNG/CCL19	5
GO:0042100	BP	GO:0042100	B cell proliferation	4/87	95/18670	0.00101401	0.0071089	0.00525697	CD38/CTLA4/IKZF3/MZB1	4
GO:0042102	BP	GO:0042102	positive regulation of T cell proliferation	4/87	95/18670	0.00101401	0.0071089	0.00525697	CD80/PDCD1LG2/CCR2/CCL19	4
GO:0042088	BP	GO:0042088	T-helper 1 type immune response	3/87	43/18670	0.00105417	0.00735112	0.0054361	CD80/CCR2/CCL19	3
GO:0002833	BP	GO:0002833	positive regulation of response to biotic stimulus	6/87	249/18670	0.00108653	0.00753674	0.00557336	SH2D1A/GBP5/CLEC4E/SLAMF6/ICAM3/AIM2	6
GO:2000404	BP	GO:2000404	regulation of T cell migration	3/87	44/18670	0.00112751	0.00777352	0.00574845	CXCL10/CXCL13/CCR2	3
GO:0071706	BP	GO:0071706	tumor necrosis factor superfamily cytokine production	5/87	168/18670	0.0011332	0.00777352	0.00574845	SLAMF1/CCR2/CD2/IFNG/CCL19	5
GO:0031341	BP	GO:0031341	regulation of cell killing	4/87	98/18670	0.00113846	0.00777352	0.00574845	SH2D1A/STAP1/SLAMF6/IFNG	4
GO:0002824	BP	GO:0002824	positive regulation of adaptive immune response based on somatic recombination of immune receptors built from immunoglobulin superfamily domains	4/87	100/18670	0.00122714	0.00833564	0.00616414	CD80/LTA/CCR2/CCL19	4
GO:0032611	BP	GO:0032611	interleukin-1 beta production	4/87	101/18670	0.00127325	0.00860425	0.00636277	GBP5/IFNG/CCL19/AIM2	4
GO:0045058	BP	GO:0045058	T cell selection	3/87	47/18670	0.00136662	0.00914103	0.00675972	IRF4/LY9/SLAMF6	3
GO:0046638	BP	GO:0046638	positive regulation of alpha-beta T cell differentiation	3/87	47/18670	0.00136662	0.00914103	0.00675972	CD80/IFNG/CCL19	3
GO:0002821	BP	GO:0002821	positive regulation of adaptive immune response	4/87	105/18670	0.00146983	0.00978145	0.0072333	CD80/LTA/CCR2/CCL19	4
GO:0001909	BP	GO:0001909	leukocyte mediated cytotoxicity	4/87	107/18670	0.00157565	0.0104195	0.00770513	SLAMF7/SH2D1A/STAP1/SLAMF6	4
GO:0050714	BP	GO:0050714	positive regulation of protein secretion	6/87	268/18670	0.0015816	0.0104195	0.00770513	CD38/CLEC4E/CD2/IFNG/CCL19/AIM2	6
GO:0045086	BP	GO:0045086	positive regulation of interleukin-2 biosynthetic process	2/87	13/18670	0.00161938	0.010615	0.00784972	IRF4/CD80	2
GO:0032653	BP	GO:0032653	regulation of interleukin-10 production	3/87	52/18670	0.00183167	0.0118877	0.00879085	IRF4/TIGIT/PDCD1LG2	3
GO:0032731	BP	GO:0032731	positive regulation of interleukin-1 beta production	3/87	52/18670	0.00183167	0.0118877	0.00879085	IFNG/CCL19/AIM2	3
GO:0050702	BP	GO:0050702	interleukin-1 beta secretion	3/87	53/18670	0.00193507	0.012497	0.0092414	GBP5/CCL19/AIM2	3
GO:0042035	BP	GO:0042035	regulation of cytokine biosynthetic process	4/87	114/18670	0.00198777	0.0127743	0.00944652	IRF4/CD80/CCR2/IFNG	4
GO:0010524	BP	GO:0010524	positive regulation of calcium ion transport into cytosol	3/87	54/18670	0.00204205	0.0129958	0.00961027	CXCL11/CXCL10/CXCL9	3
GO:0032663	BP	GO:0032663	regulation of interleukin-2 production	3/87	54/18670	0.00204205	0.0129958	0.00961027	IRF4/CD80/CCR2	3
GO:0032612	BP	GO:0032612	interleukin-1 production	4/87	115/18670	0.00205217	0.012997	0.00961121	GBP5/IFNG/CCL19/AIM2	4
GO:0032613	BP	GO:0032613	interleukin-10 production	3/87	55/18670	0.00215264	0.0135679	0.0100333	IRF4/TIGIT/PDCD1LG2	3
GO:0001912	BP	GO:0001912	positive regulation of leukocyte mediated cytotoxicity	3/87	56/18670	0.00226689	0.0141817	0.0104872	SH2D1A/STAP1/SLAMF6	3
GO:0002793	BP	GO:0002793	positive regulation of peptide secretion	6/87	288/18670	0.00227166	0.0141817	0.0104872	CD38/CLEC4E/CD2/IFNG/CCL19/AIM2	6
GO:0010820	BP	GO:0010820	positive regulation of T cell chemotaxis	2/87	16/18670	0.00246883	0.0151954	0.0112369	CXCL13/CCR2	2
GO:0032695	BP	GO:0032695	negative regulation of interleukin-12 production	2/87	16/18670	0.00246883	0.0151954	0.0112369	SLAMF1/TIGIT	2
GO:1900451	BP	GO:1900451	positive regulation of glutamate receptor signaling pathway	2/87	16/18670	0.00246883	0.0151954	0.0112369	CCR2/IFNG	2
GO:0050852	BP	GO:0050852	T cell receptor signaling pathway	5/87	202/18670	0.00254358	0.0155824	0.0115231	CTLA4/TRBV7-9/ITK/TRAC/TRAT1	5
GO:0042089	BP	GO:0042089	cytokine biosynthetic process	4/87	123/18670	0.00262013	0.0159525	0.0117968	IRF4/CD80/CCR2/IFNG	4
GO:0032732	BP	GO:0032732	positive regulation of interleukin-1 production	3/87	59/18670	0.00263197	0.0159525	0.0117968	IFNG/CCL19/AIM2	3
GO:0002831	BP	GO:0002831	regulation of response to biotic stimulus	7/87	400/18670	0.0026405	0.0159525	0.0117968	SH2D1A/GBP5/CLEC4E/SLAMF6/IFNG/ICAM3/AIM2	7
GO:0034764	BP	GO:0034764	positive regulation of transmembrane transport	5/87	204/18670	0.00265407	0.0159609	0.011803	CXCL11/CXCL10/CXCL9/CCR2/IFNG	5
GO:0042107	BP	GO:0042107	cytokine metabolic process	4/87	124/18670	0.00269797	0.0160774	0.0118891	IRF4/CD80/CCR2/IFNG	4
GO:0051209	BP	GO:0051209	release of sequestered calcium ion into cytosol	4/87	124/18670	0.00269797	0.0160774	0.0118891	CXCL11/CXCL10/CXCL9/CCL19	4
GO:0002703	BP	GO:0002703	regulation of leukocyte mediated immunity	5/87	205/18670	0.0027106	0.0160796	0.0118907	SH2D1A/STAP1/LTA/CCR2/SLAMF6	5
GO:0042267	BP	GO:0042267	natural killer cell mediated cytotoxicity	3/87	60/18670	0.00276124	0.0163063	0.0120584	SLAMF7/SH2D1A/SLAMF6	3
GO:0032740	BP	GO:0032740	positive regulation of interleukin-17 production	2/87	17/18670	0.00278955	0.0163263	0.0120732	LY9/SLAMF6	2
GO:1903975	BP	GO:1903975	regulation of glial cell migration	2/87	17/18670	0.00278955	0.0163263	0.0120732	STAP1/CCR2	2
GO:0070555	BP	GO:0070555	response to interleukin-1	5/87	207/18670	0.00282627	0.0164677	0.0121778	CD38/CCL8/CCL18/CCL13/CCL19	5
GO:0051283	BP	GO:0051283	negative regulation of sequestering of calcium ion	4/87	126/18670	0.00285837	0.0165811	0.0122616	CXCL11/CXCL10/CXCL9/CCL19	4
GO:0050701	BP	GO:0050701	interleukin-1 secretion	3/87	61/18670	0.00289437	0.016716	0.0123613	GBP5/CCL19/AIM2	3
GO:0050707	BP	GO:0050707	regulation of cytokine secretion	5/87	210/18670	0.00300643	0.0172041	0.0127223	CLEC4E/CD2/IFNG/CCL19/AIM2	5
GO:0051282	BP	GO:0051282	regulation of sequestering of calcium ion	4/87	128/18670	0.0030252	0.0172041	0.0127223	CXCL11/CXCL10/CXCL9/CCL19	4
GO:0031640	BP	GO:0031640	killing of cells of other organism	3/87	62/18670	0.00303139	0.0172041	0.0127223	LYZ/CCL13/IFNG	3
GO:0032623	BP	GO:0032623	interleukin-2 production	3/87	62/18670	0.00303139	0.0172041	0.0127223	IRF4/CD80/CCR2	3
GO:0043011	BP	GO:0043011	myeloid dendritic cell differentiation	2/87	18/18670	0.00312877	0.0176043	0.0130183	IRF4/UBD	2
GO:0090026	BP	GO:0090026	positive regulation of monocyte chemotaxis	2/87	18/18670	0.00312877	0.0176043	0.0130183	CXCL10/CCR2	2
GO:2000401	BP	GO:2000401	regulation of lymphocyte migration	3/87	63/18670	0.00317234	0.0177732	0.0131432	CXCL10/CXCL13/CCR2	3
GO:0051208	BP	GO:0051208	sequestering of calcium ion	4/87	131/18670	0.00328773	0.0183414	0.0135633	CXCL11/CXCL10/CXCL9/CCL19	4
GO:0002228	BP	GO:0002228	natural killer cell mediated immunity	3/87	64/18670	0.00331725	0.0183925	0.0136011	SLAMF7/SH2D1A/SLAMF6	3
GO:0070374	BP	GO:0070374	positive regulation of ERK1 and ERK2 cascade	5/87	215/18670	0.00332496	0.0183925	0.0136011	SLAMF1/CCL8/CCL18/CCL13/CCL19	5
GO:0050920	BP	GO:0050920	regulation of chemotaxis	5/87	217/18670	0.00345894	0.0189649	0.0140244	CXCL10/CXCL13/STAP1/CCR2/CCL19	5
GO:0002544	BP	GO:0002544	chronic inflammatory response	2/87	19/18670	0.0034863	0.0189649	0.0140244	CXCL13/LTA	2
GO:0045063	BP	GO:0045063	T-helper 1 cell differentiation	2/87	19/18670	0.0034863	0.0189649	0.0140244	CD80/CCL19	2
GO:0045076	BP	GO:0045076	regulation of interleukin-2 biosynthetic process	2/87	19/18670	0.0034863	0.0189649	0.0140244	IRF4/CD80	2
GO:0050921	BP	GO:0050921	positive regulation of chemotaxis	4/87	135/18670	0.00366139	0.0198351	0.0146679	CXCL10/CXCL13/CCR2/CCL19	4
GO:0002705	BP	GO:0002705	positive regulation of leukocyte mediated immunity	4/87	136/18670	0.00375913	0.0202807	0.0149974	SH2D1A/STAP1/LTA/SLAMF6	4
GO:0042535	BP	GO:0042535	positive regulation of tumor necrosis factor biosynthetic process	2/87	20/18670	0.00386198	0.0207502	0.0153446	CCR2/IFNG	2
GO:0007189	BP	GO:0007189	adenylate cyclase-activating G protein-coupled receptor signaling pathway	4/87	139/18670	0.00406292	0.0217408	0.0160771	CXCL11/CXCL10/CXCL9/S1PR4	4
GO:0050766	BP	GO:0050766	positive regulation of phagocytosis	3/87	69/18670	0.00410247	0.0218632	0.0161676	IL2RG/STAP1/IFNG	3
GO:0097553	BP	GO:0097553	calcium ion transmembrane import into cytosol	4/87	140/18670	0.00416777	0.0221212	0.0163585	CXCL11/CXCL10/CXCL9/CCL19	4
GO:0048245	BP	GO:0048245	eosinophil chemotaxis	2/87	21/18670	0.00425562	0.0223165	0.0165029	CCL8/CCL13	2
GO:0140131	BP	GO:0140131	positive regulation of lymphocyte chemotaxis	2/87	21/18670	0.00425562	0.0223165	0.0165029	CXCL13/CCR2	2
GO:1901739	BP	GO:1901739	regulation of myoblast fusion	2/87	21/18670	0.00425562	0.0223165	0.0165029	CXCL10/CXCL9	2
GO:0019932	BP	GO:0019932	second-messenger-mediated signaling	7/87	439/18670	0.0044009	0.0229864	0.0169982	CXCL11/CXCL10/CXCL9/CXCR6/CCR2/TRAT1/S1PR4	7
GO:1904427	BP	GO:1904427	positive regulation of calcium ion transmembrane transport	3/87	71/18670	0.00444548	0.0231271	0.0171023	CXCL11/CXCL10/CXCL9	3
GO:1902107	BP	GO:1902107	positive regulation of leukocyte differentiation	4/87	144/18670	0.00460547	0.0238647	0.0176478	CD80/CD27/IFNG/CCL19	4
GO:0033622	BP	GO:0033622	integrin activation	2/87	22/18670	0.00466707	0.0239005	0.0176742	CXCL13/MZB1	2
GO:0042094	BP	GO:0042094	interleukin-2 biosynthetic process	2/87	22/18670	0.00466707	0.0239005	0.0176742	IRF4/CD80	2
GO:0045624	BP	GO:0045624	positive regulation of T-helper cell differentiation	2/87	22/18670	0.00466707	0.0239005	0.0176742	CD80/CCL19	2
GO:0002822	BP	GO:0002822	regulation of adaptive immune response based on somatic recombination of immune receptors built from immunoglobulin superfamily domains	4/87	145/18670	0.00471955	0.0240752	0.0178034	CD80/LTA/CCR2/CCL19	4
GO:0051607	BP	GO:0051607	defense response to virus	5/87	238/18670	0.00510967	0.0259643	0.0192004	CXCL10/CXCL9/APOBEC3A/IFNG/AIM2	5
GO:0002706	BP	GO:0002706	regulation of lymphocyte mediated immunity	4/87	149/18670	0.00519487	0.0262952	0.0194451	SH2D1A/LTA/CCR2/SLAMF6	4
GO:0002407	BP	GO:0002407	dendritic cell chemotaxis	2/87	24/18670	0.00554267	0.0276291	0.0204315	CCR2/CCL19	2
GO:0042832	BP	GO:0042832	defense response to protozoan	2/87	24/18670	0.00554267	0.0276291	0.0204315	IRF4/GBP4	2
GO:0050857	BP	GO:0050857	positive regulation of antigen receptor-mediated signaling pathway	2/87	24/18670	0.00554267	0.0276291	0.0204315	STAP1/TRAT1	2
GO:0071677	BP	GO:0071677	positive regulation of mononuclear cell migration	2/87	24/18670	0.00554267	0.0276291	0.0204315	CXCL10/CCR2	2
GO:0001910	BP	GO:0001910	regulation of leukocyte mediated cytotoxicity	3/87	78/18670	0.00578062	0.028706	0.0212279	SH2D1A/STAP1/SLAMF6	3
GO:0001562	BP	GO:0001562	response to protozoan	2/87	25/18670	0.0060065	0.0294926	0.0218095	IRF4/GBP4	2
GO:0072677	BP	GO:0072677	eosinophil migration	2/87	25/18670	0.0060065	0.0294926	0.0218095	CCL8/CCL13	2
GO:0090025	BP	GO:0090025	regulation of monocyte chemotaxis	2/87	25/18670	0.0060065	0.0294926	0.0218095	CXCL10/CCR2	2
GO:0060402	BP	GO:0060402	calcium ion transport into cytosol	4/87	158/18670	0.0063794	0.0312067	0.0230771	CXCL11/CXCL10/CXCL9/CCL19	4
GO:0010996	BP	GO:0010996	response to auditory stimulus	2/87	26/18670	0.00648744	0.0316172	0.0233807	CXCL10/TIFAB	2
GO:0051279	BP	GO:0051279	regulation of release of sequestered calcium ion into cytosol	3/87	82/18670	0.00664015	0.0322416	0.0238424	CXCL11/CXCL10/CXCL9	3
GO:0002819	BP	GO:0002819	regulation of adaptive immune response	4/87	160/18670	0.00666501	0.0322429	0.0238433	CD80/LTA/CCR2/CCL19	4
GO:0036336	BP	GO:0036336	dendritic cell migration	2/87	27/18670	0.00698534	0.0336683	0.0248975	CCR2/CCL19	2
GO:0045577	BP	GO:0045577	regulation of B cell differentiation	2/87	28/18670	0.00750004	0.0360167	0.026634	CD27/IKZF3	2
GO:0001776	BP	GO:0001776	leukocyte homeostasis	3/87	86/18670	0.00757187	0.0362289	0.026791	SIT1/CCR2/GPR174	3
GO:0033209	BP	GO:0033209	tumor necrosis factor-mediated signaling pathway	4/87	167/18670	0.00773117	0.0368566	0.0272552	CD27/TNFRSF9/LTA/AIM2	4
GO:0035025	BP	GO:0035025	positive regulation of Rho protein signal transduction	2/87	29/18670	0.00803136	0.0380113	0.028109	P2RY10/GPR174	2
GO:0060142	BP	GO:0060142	regulation of syncytium formation by plasma membrane fusion	2/87	29/18670	0.00803136	0.0380113	0.028109	CXCL10/CXCL9	2
GO:0032651	BP	GO:0032651	regulation of interleukin-1 beta production	3/87	90/18670	0.00857718	0.0403128	0.029811	IFNG/CCL19/AIM2	3
GO:0045954	BP	GO:0045954	positive regulation of natural killer cell mediated cytotoxicity	2/87	30/18670	0.00857916	0.0403128	0.029811	SH2D1A/SLAMF6	2
GO:0007202	BP	GO:0007202	activation of phospholipase C activity	2/87	31/18670	0.00914325	0.0426577	0.031545	ITK/S1PR4	2
GO:0051482	BP	GO:0051482	positive regulation of cytosolic calcium ion concentration involved in phospholipase C-activating G protein-coupled signaling pathway	2/87	31/18670	0.00914325	0.0426577	0.031545	P2RY10/GPR174	2
GO:0051897	BP	GO:0051897	positive regulation of protein kinase B signaling	4/87	176/18670	0.00925938	0.0427637	0.0316234	ICOS/CD80/TRAT1/CCL19	4
GO:0060401	BP	GO:0060401	cytosolic calcium ion transport	4/87	176/18670	0.00925938	0.0427637	0.0316234	CXCL11/CXCL10/CXCL9/CCL19	4
GO:0043270	BP	GO:0043270	positive regulation of ion transport	5/87	275/18670	0.00926383	0.0427637	0.0316234	CXCL11/CXCL10/CXCL9/CCR2/IFNG	5
GO:0045589	BP	GO:0045589	regulation of regulatory T cell differentiation	2/87	32/18670	0.00972349	0.0447281	0.033076	CTLA4/IFNG	2
GO:0071347	BP	GO:0071347	cellular response to interleukin-1	4/87	179/18670	0.00980948	0.0449658	0.0332519	CCL8/CCL18/CCL13/CCL19	4
GO:0002717	BP	GO:0002717	positive regulation of natural killer cell mediated immunity	2/87	33/18670	0.0103197	0.0468137	0.0346183	SH2D1A/SLAMF6	2
GO:0032633	BP	GO:0032633	interleukin-4 production	2/87	33/18670	0.0103197	0.0468137	0.0346183	IRF4/ITK	2
GO:0050718	BP	GO:0050718	positive regulation of interleukin-1 beta secretion	2/87	33/18670	0.0103197	0.0468137	0.0346183	CCL19/AIM2	2
GO:0019933	BP	GO:0019933	cAMP-mediated signaling	4/87	184/18670	0.0107728	0.0487005	0.0360136	CXCL11/CXCL10/CXCL9/S1PR4	4
GO:0050764	BP	GO:0050764	regulation of phagocytosis	3/87	98/18670	0.0108133	0.0487155	0.0360247	IL2RG/STAP1/IFNG	3
GO:0042533	BP	GO:0042533	tumor necrosis factor biosynthetic process	2/87	34/18670	0.0109318	0.0487468	0.0360479	CCR2/IFNG	2
GO:0042534	BP	GO:0042534	regulation of tumor necrosis factor biosynthetic process	2/87	34/18670	0.0109318	0.0487468	0.0360479	CCR2/IFNG	2
GO:2000273	BP	GO:2000273	positive regulation of signaling receptor activity	2/87	34/18670	0.0109318	0.0487468	0.0360479	CCR2/IFNG	2
GO:1903708	BP	GO:1903708	positive regulation of hemopoiesis	4/87	185/18670	0.0109725	0.0487627	0.0360596	CD80/CD27/IFNG/CCL19	4
GO:0019814	CC	GO:0019814	immunoglobulin complex	19/88	159/19717	3.08097e-22	2.27992e-20	2.04317e-20	IGLV2-14/IGHG1/IGKC/IGKV1-5/IGHV3-21/IGHV3-33/IGLV1-44/IGLC2/IGHM/IGHV3-15/IGKV1-8/IGLV1-47/IGLL5/IGLV1-51/IGHV1-69-2/IGKV3-20/IGKV1-12/TRBC2/IGKV1-17	19
GO:0009897	CC	GO:0009897	external side of plasma membrane	22/88	393/19717	1.97442e-18	7.30536e-17	6.54676e-17	CXCL10/ICOS/CXCL9/IGHG1/CXCR6/CD80/CD27/PDCD1LG2/CTLA4/IL2RG/IGKC/TNFRSF9/IGHV3-21/IGHV3-33/CCR2/IGLC2/IGHM/IGHV3-15/IGLL5/CD2/IGHV1-69-2/TRBC2	22
GO:0042101	CC	GO:0042101	T cell receptor complex	15/88	127/19717	1.24481e-17	3.07053e-16	2.75168e-16	TRAV22/TRBV3-1/TRBV7-9/TRBV18/TRBV10-3/TRBV20-1/TRAV26-1/TRBV29-1/TRBV5-1/TRAC/TRAT1/TRAV8-6/TRBC2/TRAV16/TRAV13-1	15
GO:0042571	CC	GO:0042571	immunoglobulin complex, circulating	11/88	72/19717	1.7765e-14	3.28652e-13	2.94524e-13	IGHG1/IGKC/IGHV3-21/IGHV3-33/IGLC2/IGHM/IGHV3-15/IGLL5/IGHV1-69-2/IGKV3-20/TRBC2	11
GO:0098802	CC	GO:0098802	plasma membrane signaling receptor complex	15/88	295/19717	3.51731e-12	5.20562e-11	4.66507e-11	TRAV22/TRBV3-1/TRBV7-9/TRBV18/TRBV10-3/TRBV20-1/TRAV26-1/TRBV29-1/TRBV5-1/TRAC/TRAT1/TRAV8-6/TRBC2/TRAV16/TRAV13-1	15
GO:0072562	CC	GO:0072562	blood microparticle	8/88	147/19717	3.06291e-07	3.77759e-06	3.38532e-06	IGHG1/IGKC/IGKV1-5/IGLC2/IGHM/IGLV1-47/IGKV3-20/IGKV1-17	8
GO:0005623	CC	GO:0005623	cell	5/88	90/19717	5.14914e-05	0.000544338	0.000487813	CXCL11/CXCL13/CCL8/CCL13/CCL19	5
GO:0003823	MF	GO:0003823	antigen binding	20/72	160/17696	8.2144e-25	1.04323e-22	7.60913e-23	SLAMF1/TAP1/IGLV2-14/IGHG1/TRBV7-9/IGKC/IGKV1-5/IGHV3-21/IGHV3-33/IGLV1-44/IGLC2/IGHM/IGHV3-15/IGLV1-47/IGLL5/IGLV1-51/IGHV1-69-2/IGKV3-20/TRBC2/IGKV1-17	20
GO:0034987	MF	GO:0034987	immunoglobulin receptor binding	10/72	76/17696	5.00811e-13	3.18015e-11	2.31954e-11	IGHG1/IGKC/IGHV3-21/IGHV3-33/IGLC2/IGHM/IGHV3-15/IGLL5/IGHV1-69-2/TRBC2	10
GO:0042379	MF	GO:0042379	chemokine receptor binding	9/72	66/17696	5.60542e-12	2.37296e-10	1.7308e-10	CXCL11/CXCL10/CXCL9/CXCL13/CCL8/CCL18/CCR2/CCL13/CCL19	9
GO:0008009	MF	GO:0008009	chemokine activity	8/72	49/17696	1.98632e-11	6.30655e-10	4.59989e-10	CXCL11/CXCL10/CXCL9/CXCL13/CCL8/CCL18/CCL13/CCL19	8
GO:0005126	MF	GO:0005126	cytokine receptor binding	12/72	286/17696	1.63472e-09	4.15218e-08	3.02853e-08	CXCL11/CXCL10/CXCL9/CXCL13/CCL8/STAP1/CCL18/LTA/CCR2/CCL13/IFNG/CCL19	12
GO:0005125	MF	GO:0005125	cytokine activity	10/72	220/17696	1.96755e-08	3.60221e-07	2.62739e-07	CXCL11/CXCL10/CXCL9/CXCL13/CCL8/CCL18/LTA/CCL13/IFNG/CCL19	10
GO:0048020	MF	GO:0048020	CCR chemokine receptor binding	6/72	43/17696	1.98547e-08	3.60221e-07	2.62739e-07	CXCL13/CCL8/CCL18/CCR2/CCL13/CCL19	6
GO:0045236	MF	GO:0045236	CXCR chemokine receptor binding	4/72	11/17696	8.13465e-08	1.29138e-06	9.41907e-07	CXCL11/CXCL10/CXCL9/CXCL13	4
GO:0001664	MF	GO:0001664	G protein-coupled receptor binding	9/72	280/17696	1.94644e-06	2.74664e-05	2.00335e-05	CXCL11/CXCL10/CXCL9/CXCL13/CCL8/CCL18/CCR2/CCL13/CCL19	9
GO:0048018	MF	GO:0048018	receptor ligand activity	10/72	482/17696	2.41838e-05	0.000304912	0.000222398	CXCL11/CXCL10/CXCL9/CXCL13/CCL8/CCL18/LTA/CCL13/IFNG/CCL19	10
GO:0030546	MF	GO:0030546	signaling receptor activator activity	10/72	487/17696	2.64097e-05	0.000304912	0.000222398	CXCL11/CXCL10/CXCL9/CXCL13/CCL8/CCL18/LTA/CCL13/IFNG/CCL19	10
GO:0005539	MF	GO:0005539	glycosaminoglycan binding	6/72	229/17696	0.000337111	0.00356776	0.00260226	PLA2G2D/CXCL11/CXCL10/CXCL13/CCL8/IGHM	6
GO:0008201	MF	GO:0008201	heparin binding	5/72	169/17696	0.000625098	0.00610673	0.00445414	PLA2G2D/CXCL11/CXCL10/CXCL13/CCL8	5
GO:0005068	MF	GO:0005068	transmembrane receptor protein tyrosine kinase adaptor activity	2/72	13/17696	0.00123698	0.0112212	0.00818451	STAP1/TRAT1	2
GO:0045125	MF	GO:0045125	bioactive lipid receptor activity	2/72	14/17696	0.00143935	0.0121865	0.00888859	S1PR4/GPR174	2
GO:0030971	MF	GO:0030971	receptor tyrosine kinase binding	3/72	69/17696	0.00279177	0.0221597	0.0161629	STAP1/TRAT1/CD2	3
GO:1901681	MF	GO:1901681	sulfur compound binding	5/72	250/17696	0.00350437	0.0261797	0.019095	PLA2G2D/CXCL11/CXCL10/CXCL13/CCL8	5
GO:0016493	MF	GO:0016493	C-C chemokine receptor activity	2/72	23/17696	0.00390814	0.0275741	0.0201121	CXCR6/CCR2	2
GO:0019957	MF	GO:0019957	C-C chemokine binding	2/72	24/17696	0.00425225	0.0284229	0.0207312	CXCR6/CCR2	2
GO:0001637	MF	GO:0001637	G protein-coupled chemoattractant receptor activity	2/72	26/17696	0.00498097	0.030123	0.0219712	CXCR6/CCR2	2
GO:0004950	MF	GO:0004950	chemokine receptor activity	2/72	26/17696	0.00498097	0.030123	0.0219712	CXCR6/CCR2	2
GO:1990782	MF	GO:1990782	protein tyrosine kinase binding	3/72	93/17696	0.00645059	0.0372375	0.0271604	STAP1/TRAT1/CD2	3
GO:0042605	MF	GO:0042605	peptide antigen binding	2/72	31/17696	0.00703384	0.0372599	0.0271767	TAP1/TRBV7-9	2
GO:0004896	MF	GO:0004896	cytokine receptor activity	3/72	96/17696	0.00704123	0.0372599	0.0271767	CXCR6/IL2RG/CCR2	3
GO:0019956	MF	GO:0019956	chemokine binding	2/72	32/17696	0.00748314	0.0380144	0.027727	CXCR6/CCR2	2
GO:0030159	MF	GO:0030159	signaling receptor complex adaptor activity	2/72	36/17696	0.00940583	0.0442423	0.0322695	STAP1/TRAT1	2
GO:0042169	MF	GO:0042169	SH2 domain binding	2/72	36/17696	0.00940583	0.0442423	0.0322695	LAX1/SIT1	2
