# Supplementary material for: Tumor Immune Microenvironment Related Gene-Based Model to Predict Prognosis and Response to Compounds in Ovarian Cancer
Source: Frontiers journal article supplement (doi:10.3389/fonc.2021.807410), 2021-12-13
Supplement: Table_4.xls [file Table_4.xls]

## Sheet: deg_kegg(gsva)
	logFC	AveExpr	t	P.Value	adj.P.Val	B
KEGG_PRIMARY_IMMUNODEFICIENCY	-0.297832	-0.0148793	-8.11538	6.59429e-15	1.22654e-12	23.2751
KEGG_CHEMOKINE_SIGNALING_PATHWAY	-0.16372	-0.00884883	-5.979	5.12881e-09	4.7698e-07	10.2161
KEGG_INTESTINAL_IMMUNE_NETWORK_FOR_IGA_PRODUCTION	-0.221786	0.00195523	-5.83513	1.14176e-08	6.21294e-07	9.45078
KEGG_NATURAL_KILLER_CELL_MEDIATED_CYTOTOXICITY	-0.172422	-0.00105879	-5.80654	1.33612e-08	6.21294e-07	9.30055
KEGG_NOD_LIKE_RECEPTOR_SIGNALING_PATHWAY	-0.179185	-0.00464911	-5.76458	1.68106e-08	6.22702e-07	9.08113
KEGG_TYPE_I_DIABETES_MELLITUS	-0.241761	0.0110955	-5.68555	2.58138e-08	6.22702e-07	8.67157
KEGG_ALLOGRAFT_REJECTION	-0.267503	0.0136271	-5.68169	2.63579e-08	6.22702e-07	8.65165
KEGG_SYSTEMIC_LUPUS_ERYTHEMATOSUS	-0.20617	0.00670874	-5.67872	2.67829e-08	6.22702e-07	8.63639
KEGG_ANTIGEN_PROCESSING_AND_PRESENTATION	-0.196225	0.00646045	-5.64269	3.25099e-08	6.71872e-07	8.45145
KEGG_T_CELL_RECEPTOR_SIGNALING_PATHWAY	-0.165987	-0.0113533	-5.57834	4.58444e-08	8.52706e-07	8.12357
KEGG_GRAFT_VERSUS_HOST_DISEASE	-0.266918	0.0147315	-5.48391	7.54889e-08	1.27645e-06	7.64817
KEGG_TOLL_LIKE_RECEPTOR_SIGNALING_PATHWAY	-0.160254	0.00950499	-5.41496	1.08179e-07	1.67677e-06	7.30548
KEGG_LEISHMANIA_INFECTION	-0.20059	0.00491449	-5.3248	1.72221e-07	2.30006e-06	6.86296
KEGG_HEMATOPOIETIC_CELL_LINEAGE	-0.183089	-0.00090798	-5.32379	1.73123e-07	2.30006e-06	6.858
KEGG_FC_EPSILON_RI_SIGNALING_PATHWAY	-0.116476	-0.0153875	-5.26588	2.32592e-07	2.87e-06	6.57721
KEGG_CYTOSOLIC_DNA_SENSING_PATHWAY	-0.131582	0.00772536	-5.25413	2.46882e-07	2.87e-06	6.52054
KEGG_CYTOKINE_CYTOKINE_RECEPTOR_INTERACTION	-0.146386	0.000246305	-5.15291	4.10722e-07	4.49378e-06	6.03702
KEGG_AUTOIMMUNE_THYROID_DISEASE	-0.192554	0.0297016	-5.14075	4.36401e-07	4.50948e-06	5.97945
KEGG_VIRAL_MYOCARDITIS	-0.149847	-0.0106511	-5.0373	7.27419e-07	7.12105e-06	5.49476
KEGG_CELL_ADHESION_MOLECULES_CAMS	-0.144401	-0.00612919	-4.86422	1.67836e-06	1.49551e-05	4.70306
KEGG_RIG_I_LIKE_RECEPTOR_SIGNALING_PATHWAY	-0.114046	0.00450284	-4.86295	1.68847e-06	1.49551e-05	4.69738
KEGG_B_CELL_RECEPTOR_SIGNALING_PATHWAY	-0.145766	-0.00840864	-4.8307	1.96786e-06	1.66373e-05	4.55259
KEGG_JAK_STAT_SIGNALING_PATHWAY	-0.102436	-0.00277291	-4.46821	1.03863e-05	8.39937e-05	2.98425
KEGG_ASTHMA	-0.18612	0.00909213	-4.42033	1.28361e-05	9.94795e-05	2.78528
KEGG_PANTOTHENATE_AND_COA_BIOSYNTHESIS	-0.116259	-0.0226916	-4.22361	3.00422e-05	0.000223514	1.9882
KEGG_PROTEASOME	-0.151743	-0.0197355	-3.92133	0.000104255	0.000745827	0.828016
KEGG_FC_GAMMA_R_MEDIATED_PHAGOCYTOSIS	-0.110302	-0.0128708	-3.8541	0.000136075	0.000937408	0.580752
KEGG_ETHER_LIPID_METABOLISM	-0.074642	-0.022663	-3.68615	0.00026036	0.00172954	-0.0196719
KEGG_VEGF_SIGNALING_PATHWAY	-0.0794826	-0.0153435	-3.45929	0.000602224	0.00386254	-0.791053
KEGG_LYSOSOME	-0.108367	-0.0106291	-3.36418	0.000844849	0.00523807	-1.10076
KEGG_CARDIAC_MUSCLE_CONTRACTION	0.0733314	-0.0282171	3.28558	0.00111112	0.0066667	-1.35058
KEGG_TASTE_TRANSDUCTION	0.0728127	-0.00999812	3.27402	0.00115629	0.00672092	-1.38686
KEGG_TRYPTOPHAN_METABOLISM	-0.0695719	-0.0251844	-3.24501	0.00127726	0.00719912	-1.47736
KEGG_APOPTOSIS	-0.0900107	-0.00716053	-3.16596	0.00166888	0.00912976	-1.72006
KEGG_ALPHA_LINOLENIC_ACID_METABOLISM	-0.0755087	-0.0209045	-3.05609	0.00239887	0.0127483	-2.04798
KEGG_PRION_DISEASES	-0.0693799	-0.018065	-2.82004	0.0050503	0.0260932	-2.71509
KEGG_BASAL_CELL_CARCINOMA	0.0774062	-0.0198827	2.80449	0.00529514	0.026527	-2.75722
KEGG_EPITHELIAL_CELL_SIGNALING_IN_HELICOBACTER_PYLORI_INFECTION	-0.0786944	-0.0168263	-2.79191	0.00550121	0.026527	-2.79117
KEGG_NICOTINATE_AND_NICOTINAMIDE_METABOLISM	-0.0741682	-0.024554	-2.78827	0.00556211	0.026527	-2.80096
KEGG_PANCREATIC_CANCER	-0.0809298	-0.0115763	-2.74719	0.00629337	0.0292642	-2.91059
KEGG_SPHINGOLIPID_METABOLISM	-0.0766422	-0.0208168	-2.7319	0.00658704	0.0298827	-2.951
KEGG_DNA_REPLICATION	-0.111011	-0.0200514	-2.70867	0.00705711	0.0312529	-3.012
KEGG_COMPLEMENT_AND_COAGULATION_CASCADES	-0.0717487	-0.00821181	-2.6407	0.00861043	0.0372451	-3.18755
KEGG_AMINO_SUGAR_AND_NUCLEOTIDE_SUGAR_METABOLISM	-0.0867229	-0.0160353	-2.62569	0.00899226	0.0379494	-3.22573
KEGG_ABC_TRANSPORTERS	-0.0603586	-0.0192892	-2.61847	0.0091813	0.0379494	-3.24402
KEGG_GLYOXYLATE_AND_DICARBOXYLATE_METABOLISM	-0.0813406	-0.0241042	-2.53107	0.0117691	0.0461009	-3.46163
KEGG_PYRIMIDINE_METABOLISM	-0.0695118	-0.0222252	-2.53013	0.0118002	0.0461009	-3.46393
KEGG_ALANINE_ASPARTATE_AND_GLUTAMATE_METABOLISM	-0.0571349	-0.0244088	-2.52483	0.0119766	0.0461009	-3.47689
KEGG_LEUKOCYTE_TRANSENDOTHELIAL_MIGRATION	-0.0650054	-0.0142069	-2.51984	0.0121449	0.0461009	-3.48907
KEGG_OTHER_GLYCAN_DEGRADATION	-0.0900547	-0.011422	-2.4864	0.0133277	0.0495791	-3.57008
KEGG_PPAR_SIGNALING_PATHWAY	-0.0458316	-0.0246677	-2.46726	0.0140498	0.0508118	-3.61599
KEGG_SNARE_INTERACTIONS_IN_VESICULAR_TRANSPORT	-0.0766499	-0.0201606	-2.46325	0.0142054	0.0508118	-3.62556
KEGG_PROTEIN_EXPORT	-0.0930999	-0.0196727	-2.44344	0.0149966	0.0518273	-3.67262
KEGG_HOMOLOGOUS_RECOMBINATION	-0.0872479	-0.0207015	-2.44222	0.0150466	0.0518273	-3.67551
KEGG_GALACTOSE_METABOLISM	-0.0654456	-0.0187338	-2.39515	0.017091	0.0577985	-3.78582
KEGG_ACUTE_MYELOID_LEUKEMIA	-0.0693977	-0.0100262	-2.3402	0.0197837	0.0657102	-3.91195
KEGG_UBIQUITIN_MEDIATED_PROTEOLYSIS	-0.0725514	-0.0119965	-2.32068	0.0208264	0.0679599	-3.95609
KEGG_MISMATCH_REPAIR	-0.0899833	-0.0200805	-2.31297	0.0212511	0.06815	-3.97341
KEGG_ADIPOCYTOKINE_SIGNALING_PATHWAY	-0.0533892	-0.0198964	-2.30315	0.021803	0.0687349	-3.9954
KEGG_NON_SMALL_CELL_LUNG_CANCER	-0.0620306	-0.0180963	-2.27393	0.0235203	0.0719366	-4.0603
KEGG_RENIN_ANGIOTENSIN_SYSTEM	-0.0633575	-0.0207125	-2.27275	0.0235921	0.0719366	-4.0629
KEGG_DRUG_METABOLISM_OTHER_ENZYMES	-0.0387854	-0.0144609	-2.20876	0.0277804	0.0824836	-4.20214
KEGG_TIGHT_JUNCTION	0.04404	-0.0227489	2.20652	0.027938	0.0824836	-4.20695
KEGG_GLYCEROPHOSPHOLIPID_METABOLISM	-0.0423421	-0.020776	-2.19213	0.0289686	0.0841901	-4.23768
KEGG_BASAL_TRANSCRIPTION_FACTORS	-0.0678543	-0.0241677	-2.17219	0.0304514	0.086293	-4.27996
KEGG_CELL_CYCLE	-0.0688813	-0.0181569	-2.16997	0.0306201	0.086293	-4.28464
KEGG_SMALL_CELL_LUNG_CANCER	-0.0578132	-0.0161603	-2.16287	0.0311662	0.0865212	-4.29959
KEGG_NON_HOMOLOGOUS_END_JOINING	-0.0773476	-0.0111951	-2.1367	0.0332524	0.0909552	-4.35428
KEGG_CYSTEINE_AND_METHIONINE_METABOLISM	-0.0536879	-0.0248133	-2.1158	0.0350038	0.0943581	-4.39749
KEGG_RENAL_CELL_CARCINOMA	-0.0654836	-0.00958652	-2.10286	0.0361274	0.0948107	-4.42404
KEGG_AXON_GUIDANCE	0.0515636	-0.0181774	2.10213	0.0361912	0.0948107	-4.42552
KEGG_GLYCOSAMINOGLYCAN_DEGRADATION	-0.0659154	-0.00878641	-2.08843	0.0374158	0.0966575	-4.45344
KEGG_TYROSINE_METABOLISM	0.0373065	-0.0277066	2.07671	0.0384912	0.0980735	-4.47718
KEGG_PORPHYRIN_AND_CHLOROPHYLL_METABOLISM	-0.0466684	-0.011691	-2.02664	0.043388	0.109056	-4.57714
KEGG_SELENOAMINO_ACID_METABOLISM	-0.0604236	-0.0237283	-2.00499	0.0456643	0.113247	-4.61964
KEGG_BETA_ALANINE_METABOLISM	-0.0528283	-0.0254044	-1.9977	0.0464529	0.113687	-4.63384
KEGG_LINOLEIC_ACID_METABOLISM	-0.0466696	-0.0195308	-1.97349	0.0491553	0.118739	-4.68066
KEGG_CHRONIC_MYELOID_LEUKEMIA	-0.057909	-0.0107797	-1.90569	0.057435	0.136212	-4.80876
KEGG_BLADDER_CANCER	-0.0512144	-0.0179768	-1.90249	0.0578534	0.136212	-4.8147
KEGG_SPLICEOSOME	-0.0662745	-0.0131	-1.87973	0.0609001	0.141593	-4.85665
KEGG_ONE_CARBON_POOL_BY_FOLATE	-0.0583084	-0.0298003	-1.83414	0.0674057	0.153934	-4.9392
KEGG_NEUROTROPHIN_SIGNALING_PATHWAY	-0.0519826	-0.014301	-1.83107	0.0678634	0.153934	-4.94469
KEGG_GLYCOSYLPHOSPHATIDYLINOSITOL_GPI_ANCHOR_BIOSYNTHESIS	-0.0644929	-0.0194363	-1.81413	0.070436	0.156378	-4.97479
KEGG_VASCULAR_SMOOTH_MUSCLE_CONTRACTION	-0.0367431	-0.0173452	-1.81293	0.0706222	0.156378	-4.97693
KEGG_HEDGEHOG_SIGNALING_PATHWAY	0.0453358	-0.0262746	1.76175	0.0789052	0.172663	-5.06617
KEGG_RNA_DEGRADATION	-0.0564273	-0.0190185	-1.75602	0.0798808	0.172765	-5.07601
KEGG_AMINOACYL_TRNA_BIOSYNTHESIS	-0.0654973	-0.0189784	-1.72843	0.0847131	0.180129	-5.12292
KEGG_OLFACTORY_TRANSDUCTION	0.0493873	0.0706613	1.7256	0.0852221	0.180129	-5.1277
KEGG_ENDOCYTOSIS	-0.0451421	-0.0152014	-1.65086	0.0995837	0.208119	-5.25092
KEGG_MELANOGENESIS	0.0345122	-0.0206359	1.62259	0.105497	0.218027	-5.29613
KEGG_NUCLEOTIDE_EXCISION_REPAIR	-0.0537515	-0.022576	-1.60309	0.109736	0.224295	-5.32686
KEGG_N_GLYCAN_BIOSYNTHESIS	-0.0489858	-0.0106997	-1.47642	0.14065	0.284357	-5.51757
KEGG_GLIOMA	-0.0384026	-0.0178576	-1.46318	0.144235	0.286477	-5.53661
KEGG_ARRHYTHMOGENIC_RIGHT_VENTRICULAR_CARDIOMYOPATHY_ARVC	0.0344627	-0.0192819	1.45968	0.145194	0.286477	-5.54161
KEGG_PEROXISOME	-0.0411252	-0.022642	-1.4556	0.146319	0.286477	-5.54743
KEGG_REGULATION_OF_ACTIN_CYTOSKELETON	-0.0329302	-0.0182548	-1.43328	0.15259	0.295644	-5.57898
KEGG_PATHOGENIC_ESCHERICHIA_COLI_INFECTION	-0.037215	-0.0231451	-1.4203	0.15633	0.296489	-5.5971
KEGG_GNRH_SIGNALING_PATHWAY	-0.0301059	-0.0183647	-1.41898	0.156715	0.296489	-5.59893
KEGG_DORSO_VENTRAL_AXIS_FORMATION	-0.0413111	-0.00936222	-1.41079	0.159114	0.296489	-5.61027
KEGG_PROGESTERONE_MEDIATED_OOCYTE_MATURATION	-0.0354266	-0.0178705	-1.40981	0.159403	0.296489	-5.61162
KEGG_BASE_EXCISION_REPAIR	-0.0463603	-0.025086	-1.36274	0.173761	0.319995	-5.6755
KEGG_COLORECTAL_CANCER	-0.0396953	-0.0122518	-1.35492	0.176237	0.321373	-5.6859
KEGG_P53_SIGNALING_PATHWAY	-0.032052	-0.0229562	-1.34394	0.179758	0.323938	-5.70041
KEGG_METABOLISM_OF_XENOBIOTICS_BY_CYTOCHROME_P450	0.0319196	-0.0100469	1.33467	0.182772	0.323938	-5.71257
KEGG_VIBRIO_CHOLERAE_INFECTION	-0.0357802	-0.018126	-1.33438	0.182868	0.323938	-5.71295
KEGG_GLYCOSAMINOGLYCAN_BIOSYNTHESIS_HEPARAN_SULFATE	0.0369988	-0.0196954	1.3211	0.187253	0.327066	-5.73022
KEGG_RIBOSOME	0.0719889	-0.014346	1.31841	0.188151	0.327066	-5.7337
KEGG_PHOSPHATIDYLINOSITOL_SIGNALING_SYSTEM	-0.0365537	-0.01449	-1.31165	0.190419	0.327944	-5.7424
KEGG_ERBB_SIGNALING_PATHWAY	-0.0344388	-0.0140872	-1.2838	0.199985	0.341253	-5.77781
KEGG_PURINE_METABOLISM	-0.025675	-0.0246125	-1.27695	0.202389	0.341253	-5.7864
KEGG_GLYCOSAMINOGLYCAN_BIOSYNTHESIS_KERATAN_SULFATE	-0.0417612	-0.0198676	-1.27338	0.203651	0.341253	-5.79086
KEGG_INSULIN_SIGNALING_PATHWAY	-0.0298285	-0.0147046	-1.22792	0.220227	0.365734	-5.84657
KEGG_INOSITOL_PHOSPHATE_METABOLISM	-0.0365676	-0.0137954	-1.20924	0.227312	0.37416	-5.86888
KEGG_GLYCOSPHINGOLIPID_BIOSYNTHESIS_GANGLIO_SERIES	-0.0395339	-0.0130977	-1.19686	0.232099	0.378688	-5.88348
KEGG_STEROID_BIOSYNTHESIS	-0.0416865	-0.028453	-1.19031	0.234657	0.379532	-5.89114
KEGG_AMYOTROPHIC_LATERAL_SCLEROSIS_ALS	-0.0257602	-0.0239829	-1.18008	0.238698	0.382739	-5.90303
KEGG_PROSTATE_CANCER	-0.0302592	-0.0158786	-1.13575	0.25677	0.408198	-5.95336
KEGG_REGULATION_OF_AUTOPHAGY	-0.0231187	0.0164891	-1.12435	0.261567	0.40943	-5.96599
KEGG_GLYCEROLIPID_METABOLISM	-0.0221531	-0.0164511	-1.12345	0.261947	0.40943	-5.96698
KEGG_DILATED_CARDIOMYOPATHY	0.0254281	-0.0173233	1.11588	0.265169	0.411011	-5.97529
KEGG_TYPE_II_DIABETES_MELLITUS	-0.0237147	-0.0195606	-1.09679	0.27342	0.420298	-5.99601
KEGG_DRUG_METABOLISM_CYTOCHROME_P450	0.0252373	-0.012632	1.08653	0.277923	0.421759	-6.00699
KEGG_SULFUR_METABOLISM	-0.0311911	-0.0229467	-1.08431	0.278905	0.421759	-6.00935
KEGG_VASOPRESSIN_REGULATED_WATER_REABSORPTION	-0.0282492	-0.0223427	-1.07433	0.283347	0.425021	-6.01992
KEGG_CITRATE_CYCLE_TCA_CYCLE	-0.0404905	-0.0206961	-1.0652	0.287453	0.427729	-6.0295
KEGG_LYSINE_DEGRADATION	-0.0313274	-0.0128583	-1.01966	0.308532	0.455452	-6.07608
KEGG_GLYCINE_SERINE_AND_THREONINE_METABOLISM	-0.022433	-0.0278038	-1.00125	0.317336	0.46476	-6.09433
KEGG_WNT_SIGNALING_PATHWAY	0.0234537	-0.0184832	0.995577	0.320082	0.465119	-6.09989
KEGG_RNA_POLYMERASE	-0.031889	-0.0224259	-0.96303	0.336137	0.483209	-6.13117
KEGG_PATHWAYS_IN_CANCER	-0.0220321	-0.0179599	-0.959864	0.337727	0.483209	-6.13416
KEGG_TERPENOID_BACKBONE_BIOSYNTHESIS	-0.0345042	-0.0249226	-0.943933	0.345796	0.490978	-6.14905
KEGG_VALINE_LEUCINE_AND_ISOLEUCINE_DEGRADATION	-0.0309031	-0.0236431	-0.927987	0.353996	0.498812	-6.1637
KEGG_ARACHIDONIC_ACID_METABOLISM	-0.0174101	-0.0183689	-0.910838	0.362951	0.507585	-6.17918
KEGG_HISTIDINE_METABOLISM	-0.0210108	-0.02918	-0.895741	0.370951	0.514902	-6.19256
KEGG_ALDOSTERONE_REGULATED_SODIUM_REABSORPTION	-0.0190134	-0.0184268	-0.889675	0.374196	0.515559	-6.19788
KEGG_O_GLYCAN_BIOSYNTHESIS	0.0244187	-0.0206818	0.882282	0.378175	0.51721	-6.20431
KEGG_MAPK_SIGNALING_PATHWAY	-0.0172957	-0.0197468	-0.849383	0.396196	0.537902	-6.23228
KEGG_HYPERTROPHIC_CARDIOMYOPATHY_HCM	0.0181172	-0.0202316	0.828024	0.40817	0.548376	-6.24988
KEGG_PHENYLALANINE_METABOLISM	0.0202042	-0.0277405	0.825132	0.409808	0.548376	-6.25223
KEGG_BUTANOATE_METABOLISM	-0.0222484	-0.0287519	-0.812934	0.416759	0.553694	-6.26204
KEGG_OOCYTE_MEIOSIS	-0.0205404	-0.0212553	-0.805394	0.42109	0.55548	-6.26803
KEGG_RIBOFLAVIN_METABOLISM	-0.0210767	-0.021141	-0.790256	0.429865	0.563063	-6.27989
KEGG_MTOR_SIGNALING_PATHWAY	-0.020331	-0.0125525	-0.757105	0.44945	0.5846	-6.30509
KEGG_GLYCOSAMINOGLYCAN_BIOSYNTHESIS_CHONDROITIN_SULFATE	-0.0238145	-0.0193236	-0.650097	0.516018	0.664431	-6.37907
KEGG_PYRUVATE_METABOLISM	-0.0183509	-0.025787	-0.647073	0.51797	0.664431	-6.381
KEGG_ENDOMETRIAL_CANCER	-0.0196282	-0.0120068	-0.628013	0.530368	0.67282	-6.39294
KEGG_FATTY_ACID_METABOLISM	-0.015867	-0.0250542	-0.62591	0.531745	0.67282	-6.39424
KEGG_LIMONENE_AND_PINENE_DEGRADATION	-0.0243888	-0.0169084	-0.619855	0.53572	0.67327	-6.39795
KEGG_FRUCTOSE_AND_MANNOSE_METABOLISM	-0.0167873	-0.0235123	-0.574197	0.56617	0.706763	-6.42474
KEGG_PENTOSE_AND_GLUCURONATE_INTERCONVERSIONS	-0.0150642	-0.00826874	-0.565997	0.571726	0.70894	-6.42934
KEGG_HUNTINGTONS_DISEASE	0.0156583	-0.0232298	0.537346	0.591339	0.723256	-6.44488
KEGG_MATURITY_ONSET_DIABETES_OF_THE_YOUNG	-0.0163258	-0.0183669	-0.537194	0.591444	0.723256	-6.44496
KEGG_BIOSYNTHESIS_OF_UNSATURATED_FATTY_ACIDS	-0.0164796	-0.0215484	-0.53214	0.594936	0.723256	-6.44762
KEGG_STARCH_AND_SUCROSE_METABOLISM	-0.010258	-0.0124177	-0.515152	0.606742	0.732819	-6.45636
KEGG_TGF_BETA_SIGNALING_PATHWAY	-0.0119426	-0.0214213	-0.489342	0.624878	0.749854	-6.46911
KEGG_FOCAL_ADHESION	-0.0131418	-0.015004	-0.461562	0.644656	0.768628	-6.4821
KEGG_RETINOL_METABOLISM	0.00950785	-0.00862443	0.445857	0.655951	0.777114	-6.4891
KEGG_LONG_TERM_POTENTIATION	0.00936415	-0.0211627	0.418767	0.67562	0.794376	-6.50062
KEGG_PROXIMAL_TUBULE_BICARBONATE_RECLAMATION	-0.00938244	-0.0269421	-0.414057	0.679063	0.794376	-6.50255
KEGG_PROPANOATE_METABOLISM	-0.0127479	-0.0223874	-0.404004	0.686435	0.79798	-6.50659
KEGG_PRIMARY_BILE_ACID_BIOSYNTHESIS	-0.0101274	-0.0192675	-0.387763	0.698406	0.806854	-6.51292
KEGG_NOTCH_SIGNALING_PATHWAY	-0.0113913	-0.0145777	-0.377595	0.70594	0.809795	-6.51675
KEGG_ALZHEIMERS_DISEASE	0.0103222	-0.0219477	0.370602	0.711138	0.809795	-6.51932
KEGG_GLUTATHIONE_METABOLISM	-0.00925195	-0.0275489	-0.366742	0.714013	0.809795	-6.52072
KEGG_GLYCOSPHINGOLIPID_BIOSYNTHESIS_LACTO_AND_NEOLACTO_SERIES	0.00813119	-0.0255104	0.353163	0.72416	0.816326	-6.52553
KEGG_NITROGEN_METABOLISM	-0.00797492	-0.028851	-0.347284	0.728568	0.816347	-6.52755
KEGG_NEUROACTIVE_LIGAND_RECEPTOR_INTERACTION	0.00699166	-0.0137761	0.337079	0.736241	0.820005	-6.53099
KEGG_VALINE_LEUCINE_AND_ISOLEUCINE_BIOSYNTHESIS	-0.0116102	-0.0246393	-0.325365	0.745082	0.822531	-6.5348
KEGG_OXIDATIVE_PHOSPHORYLATION	0.0124312	-0.0222883	0.322363	0.747353	0.822531	-6.53576
KEGG_THYROID_CANCER	-0.00889123	-0.0201111	-0.307723	0.75846	0.825822	-6.5403
KEGG_LONG_TERM_DEPRESSION	-0.0051898	-0.018782	-0.306719	0.759223	0.825822	-6.5406
KEGG_PENTOSE_PHOSPHATE_PATHWAY	-0.00807527	-0.0234812	-0.278695	0.780629	0.844168	-6.54867
KEGG_STEROID_HORMONE_BIOSYNTHESIS	-0.00585344	-0.00565121	-0.266319	0.790137	0.849511	-6.55199
KEGG_TAURINE_AND_HYPOTAURINE_METABOLISM	0.00691086	-0.0316481	0.248331	0.804011	0.85946	-6.55654
KEGG_GLYCOLYSIS_GLUCONEOGENESIS	0.004944	-0.0213252	0.220996	0.825213	0.877083	-6.56285
KEGG_CIRCADIAN_RHYTHM_MAMMAL	0.00809251	-0.00927392	0.206345	0.836631	0.88335	-6.56593
KEGG_ADHERENS_JUNCTION	-0.006124	-0.0124737	-0.201252	0.840608	0.88335	-6.56695
KEGG_MELANOMA	-0.00322259	-0.0201371	-0.148269	0.882208	0.921858	-6.57606
KEGG_GLYCOSPHINGOLIPID_BIOSYNTHESIS_GLOBO_SERIES	-0.00437965	-0.0261724	-0.130934	0.895896	0.925886	-6.57844
KEGG_GAP_JUNCTION	0.002957	-0.0184901	0.130779	0.896018	0.925886	-6.57846
KEGG_ASCORBATE_AND_ALDARATE_METABOLISM	0.00319787	0.00195206	0.116951	0.90696	0.932014	-6.58015
KEGG_CALCIUM_SIGNALING_PATHWAY	0.00219261	-0.016968	0.108502	0.913654	0.933735	-6.58108
KEGG_FOLATE_BIOSYNTHESIS	-0.00326331	-0.0279986	-0.0978818	0.922077	0.937193	-6.58216
KEGG_ARGININE_AND_PROLINE_METABOLISM	0.00199345	-0.0274109	0.0894979	0.928733	0.938828	-6.58293
KEGG_PARKINSONS_DISEASE	0.0024034	-0.0212744	0.0633353	0.949532	0.954665	-6.5849
KEGG_ECM_RECEPTOR_INTERACTION	0.00118264	-0.0152895	0.0353187	0.971844	0.971844	-6.58626
