# Supplementary material for: Tumor Immune Microenvironment Related Gene-Based Model to Predict Prognosis and Response to Compounds in Ovarian Cancer
Source: Frontiers journal article supplement (doi:10.3389/fonc.2021.807410), 2021-12-13
Supplement: Table_5.xls [file Table_5.xls]

## Sheet: drug_MOA
	cmap name	enrichment	p	MoA
1	puromycin	-0.853	0.00084	Protein synthesis inhibitor
2	clofibrate	-0.947	0.00614	PPAR receptor agonist
3	doxylamine	-0.647	0.01344	Histamine receptor antagonist
4	mianserin	-0.636	0.01634	Serotonin receptor antagonist
5	dobutamine	-0.652	0.03471	Adrenergic receptor agonist
6	benzbromarone	-0.743	0.03481	Chloride channel blocker
7	loperamide	-0.541	0.03713	Opioid receptor agonist
8	vinburnine	-0.616	0.05473	Adrenergic receptor antagonist
9	perhexiline	-0.612	0.05751	Carnitine palmitoyltransferase inhibitor
10	isocarboxazid	0.541	0.06831	Monoamine oxidase inhibitor
11	cefotaxime	-0.531	0.07492	Bacterial cell wall synthesis inhibitor
12	nortriptyline	-0.587	0.07888	Tricyclic antidepressant
13	isoxicam	0.526	0.08249	Cyclooxygenase inhibitor
14	SC-560	0.646	0.09048	Cyclooxygenase inhibitor
15	pindolol	0.516	0.09312	Adrenergic receptor antagonist, Serotonin receptor antagonist
16	scriptaid	-0.613	0.12447	HDAC inhibitor
17	tamoxifen	-0.408	0.14648	Estrogen receptor antagonist, Selective estrogen receptor modulator (SERM)
18	methocarbamol	-0.581	0.17036	Muscle relaxant
19	quinidine	-0.537	0.25028	Sodium channel blocker
20	tomelukast	0.989	---	Leukotriene receptor antagonist
21	gefitinib	-0.837	---	EGFR inhibitor
